# Supplementary material for: Covalent triazine framework catalytic oxidative cleavage of lignin models and organosolv lignin
Source: Royal Society of Chemistry journal article supplement (doi:10.1039/c8gc00268a), 2018-01-01

Electronic Supplementary Information for

**Covalent Triazine Frameworks Catalytically Oxidative  
Cleavage of Lignin Models and Organosolv Lignin**

Li Zhao,<sup>a,b</sup> Song Shi,<sup>a\*</sup> Meng Liu,<sup>a,b</sup> Guozhi Zhu,<sup>a,b</sup> Min Wang,<sup>a</sup> Wenqiang Du,<sup>a</sup> Jin Gao<sup>a</sup> and  
Jie Xu<sup>a\*</sup>

<sup>a</sup> *State Key Laboratory of Catalysis, Dalian National Laboratory for Clean Energy,  
Dalian Institute of Chemical Physics, Chinese Academy of Sciences, Dalian 116023,  
P. R. China. E-mail: shisong@dicp.ac.cn, xujie@dicp.ac.cn*

<sup>b</sup> *University of Chinese Academy of Sciences, Beijing, 100049, P. R. China*

# Table of Contents

## Part I General synthesis procedures and catalytic reactions

1. Synthesis of the lignin model compounds and deuterated compound;
2. Synthesis of ethylbenzene hydroperoxide;
3. Extraction of Lignin, lignin oxidation and catalytically oxidative of oxidized lignin.

## Part II Characterizations of the catalysts

Fig. S1. FT-IR spectra of the monomers and the corresponding CTFs;

Fig. S2. TEM of (a) CTF-pDCB-1, (b) CTF-mDCB-1, (c) CTF-pDCB-10, (d) CTF-mDCB-10 and (e) CTF-DCBP-10;

Fig. S3. C 1s peak of (a) CTF-pDCB-1, (b) CTF-mDCB-1, (c) CTF-pDCB-10, (d) CTF-mDCB-10 and (e) CTF-DCBP-10 at high resolution;

Fig. S4. N 1s peak of (a) CTF-pDCB-1, (b) CTF-mDCB-1, (c) CTF-pDCB-10, (d) CTF-mDCB-10 and (e) CTF-DCBP-10 at high resolution;

Table S1. The content of different types of C;

Fig. S5. (a) C 1s peak and (b) N 1s peak of CTF-pDCB-1 after reaction at high resolution;

Fig. S6. The N<sub>2</sub> sorption isotherms and the pore size distributions of CTFs.

## Part II Reaction process analysis

Fig. S7. The products of catalytically oxidative cleavage of lignin model compound **1**;

Fig. S8. The comparison of K<sub>H</sub> and K<sub>D</sub>;

Table S2. ZnCl<sub>2</sub> as catalyst for the oxidative cleavage of lignin model compound **1**;

Table S3. Different reaction atmosphere for the catalytic cleavage of lignin model compound **1**;

Table S4 The catalytic conversion of lignin model compound **1** over the catalysts;

Fig. S9. The substrate peroxide verification;

Fig. S10. GC-MS spectrum of the reaction solution with triphenylphosphine;

Fig. S11 The verification of the proposed intermediates phenyl formate and phenylglyoxal by HRMS/MS (ESI, M+H);

Fig. S12. GC-MS spectra of the oxidation of lignin model compound **1** in methanol and butanol;

Fig. S13. The verification of CO<sub>2</sub>;

Table S5 The content of the structural units;

Table S6 The conversion of the  $\beta$ -O-4 ketone bonds;

Fig. S14. 2D HSQC NMR spectra of lignin, oxidized birch lignin and after the catalytic cleavage reaction.

## NMR spectra of the compounds

## Synthesis of lignin model compounds

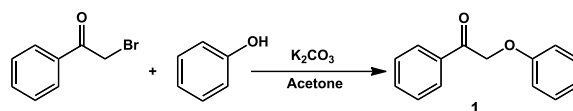

2-phenoxyacetophenone **1** was prepared by the literature procedures.<sup>1</sup> A 500 mL bottle was charged with phenol (6.9 g, 73 mmol) and  $K_2CO_3$  (10.4 g, 75 mmol) in acetone (150 mL) and stirred at RT for 30 min. To this solution, 2-bromoacetophenone (14.0 g, 70 mmol) was added, the resulting suspension was stirred at RT for 24 h, after which the suspension was filtered and concentrated *in vacuo*. The solid was dissolved in ethyl acetate and washed with NaOH aqueous (5%, 30 ml) and water (30 ml). The organic phase was dried over anhydrous  $Na_2SO_4$ . The crude product was recrystallized from ethanol to give 2-phenoxyacetophenone as a white solid. Spectral data were in accordance with those previously reported. For the other methoxy substituted 2-phenoxyacetophenone, the preparation procedure was the same as described above except using different starting materials.

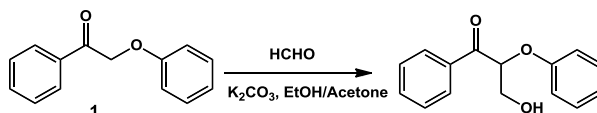

According to the literature.<sup>2</sup> A solution of 2-phenoxyacetophenone **1** (848.0 mg, 4.00 mmol) and HCHO (aqueous solution, 36 wt%, 0.6 mL, 7.3 mmol) in EtOH/acetone (1:1, 20 mL) was treated with  $K_2CO_3$  (0.6 g, 4.3 mmol) and the reaction mixture was stirred at room temperature for 4 h. The solvent was then evaporated and the residue was diluted with ethyl acetate and washed with water and brine. The organic phase was concentrated and the resulting crude materials were purified by column chromatography with hexanes/EtOAc (15:1 to 1:1) to give the product.

## Procedure for the synthesis of the deuterated compounds

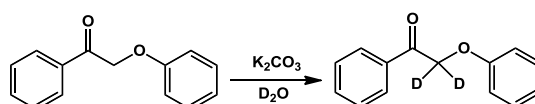

According to the literature.<sup>1</sup> 2-phenoxyacetophenone (0.50 g 2.36 mmol) was added to a vial with anhydrous  $K_2CO_3$  (0.126 g, 0.92 mmol) and 5 mL of  $D_2O$ . The vial was capped. The reaction ran at 100 °C for 24 h. The  $D_2O$  was decanted and replaced by fresh one. The reaction was maintained for additional 24 h at 100 °C. Then the solid was washed to remove the  $K_2CO_3$  residues. Finally, the solid was dried under vacuum to give deuterated compounds as a light yellow solid.

### Synthesis of ethylbenzene hydroperoxide

Ethylbenzene hydroperoxide was synthesized by thermal oxidation method. Typically, 30 mL ethylbenzene was added into a 100 mL Teflon insert reactor. Then the reactor was charged with 0.8 MPa of O<sub>2</sub> and heated to 130 °C kept for 3 h under magnetic stirring. When the reaction was complete, the reaction mixture first reacted with NaOH in water, leading to an aqueous solution of the peroxide sodium salt, which was neutralized by NaHCO<sub>3</sub> followed by extraction with n-hexane and acetonitrile.

### Extraction of Lignin<sup>3</sup>

To birch sawdust (20 g) was added 1,4-dioxane (144 mL) followed by 2N HCl (16mL) and the mixture was heated to a gentle reflux under a N<sub>2</sub> atmosphere for 1 h. The mixture was then allowed to cool and the lignin containing liquor was collected by filtration. The collected liquor was partially concentrated *in vacuo* to give a gummy residue which was taken up in acetone/water (V:V=9:1, 250 mL) and precipitated by addition to rapidly stirring water (250 mL). The crude lignin was collect by filtration and dried under vacuum. The dried crude lignin was taken up in acetone/methanol (V:V=9:1) and precipitated by dropwise addition to rapidly stirring Et<sub>2</sub>O (200 mL). The precipitated lignin was collected by filtration and dried under vacuum to give a purified birch lignin. This lignin was used in subsequent experiments without further processing.

### Lignin Oxidations<sup>3</sup>

To a solution of lignin (0.5 g) in 2-methoxyethanol (2.8 mL) and 1,2-dimethoxyethane (4.2 mL) solution was added 50 mg of DDQ followed by 22 mg of *t*BuONO. The reaction mixture was placed under an O<sub>2</sub> atmosphere (balloon) and stirred at 80 °C for 14 h. The oxidized lignin was isolated by precipitation in Et<sub>2</sub>O (70 mL) and filtering, dried under vacuum to give an oxidized birch lignin.

### Catalytically oxidative cleavage of oxidized lignin

0.1g of oxidized lignin with 10 mL of methanol and 40 mg of CTF-pDCB-1 catalyst were added into a 60 mL Teflon insert reactor. Then the reactor was charged with 0.5 MPa of O<sub>2</sub> and heated to 180 °C kept for 8 h under magnetic stirring. After the reaction was complete, the reaction mixture was centrifuged, solid catalyst was washed several times with methanol and the liquid was all collected and evaporated. DMSO-*d*<sub>6</sub> and internal sample pyrazine was added to determine the 2D HSQC NMR spectrum.

1. M. Wang, L. H. Li, J. M. Lu, H. J. Li, X. C. Zhang, H. F. Liu, N. C. Luo and F. Wang, *Green Chem.*, 2017, **19**, 702-706.
2. J. Zhang, Y. Liu, S. Chiba and T. P. Loh, *Chem. Commun.*, 2013, **49**, 11439-11441.
3. C. S. Lancefield, O. S. Ojo, F. Tran and N. J. Westwood, *Angew. Chem., Int. Ed.*, 2015, **54**, 258-262.

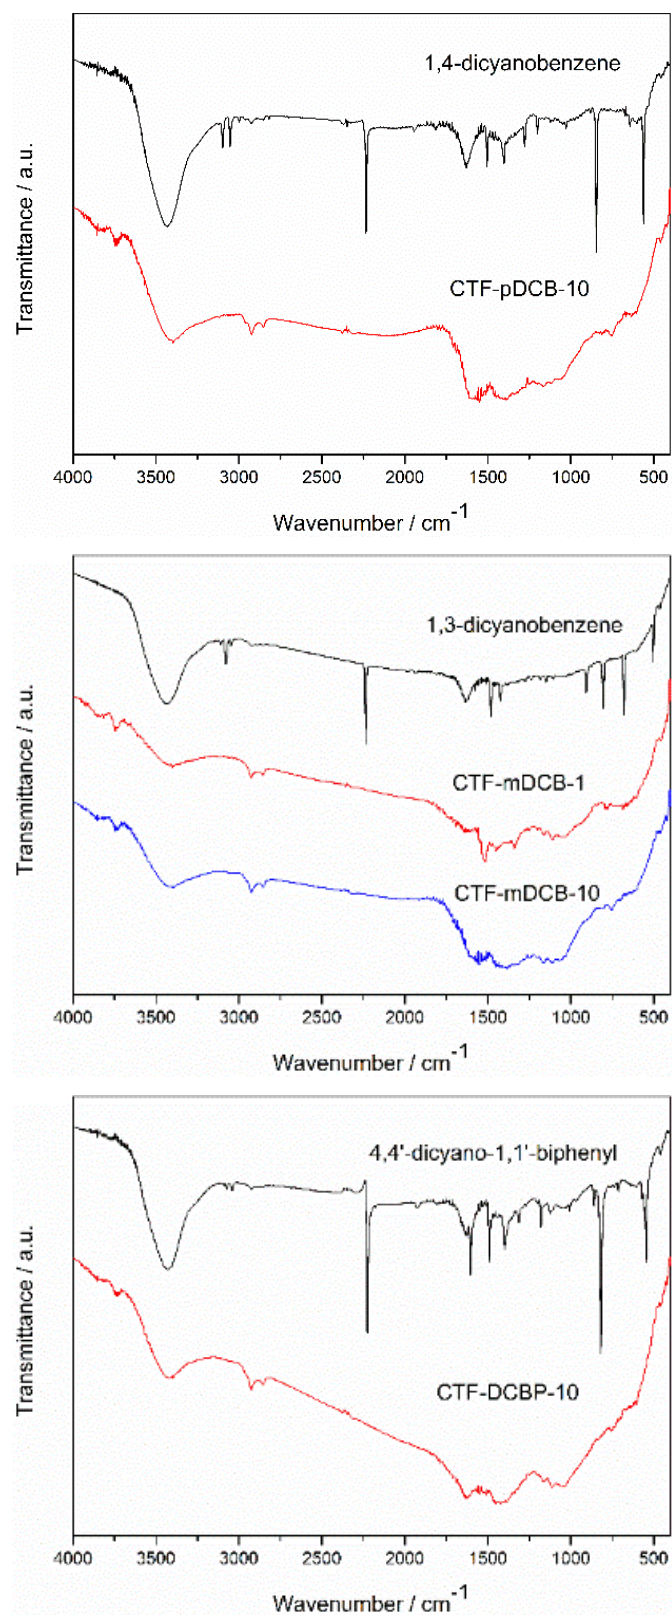

Fig. S1 FT-IR spectra of the monomers and the corresponding CTFs.

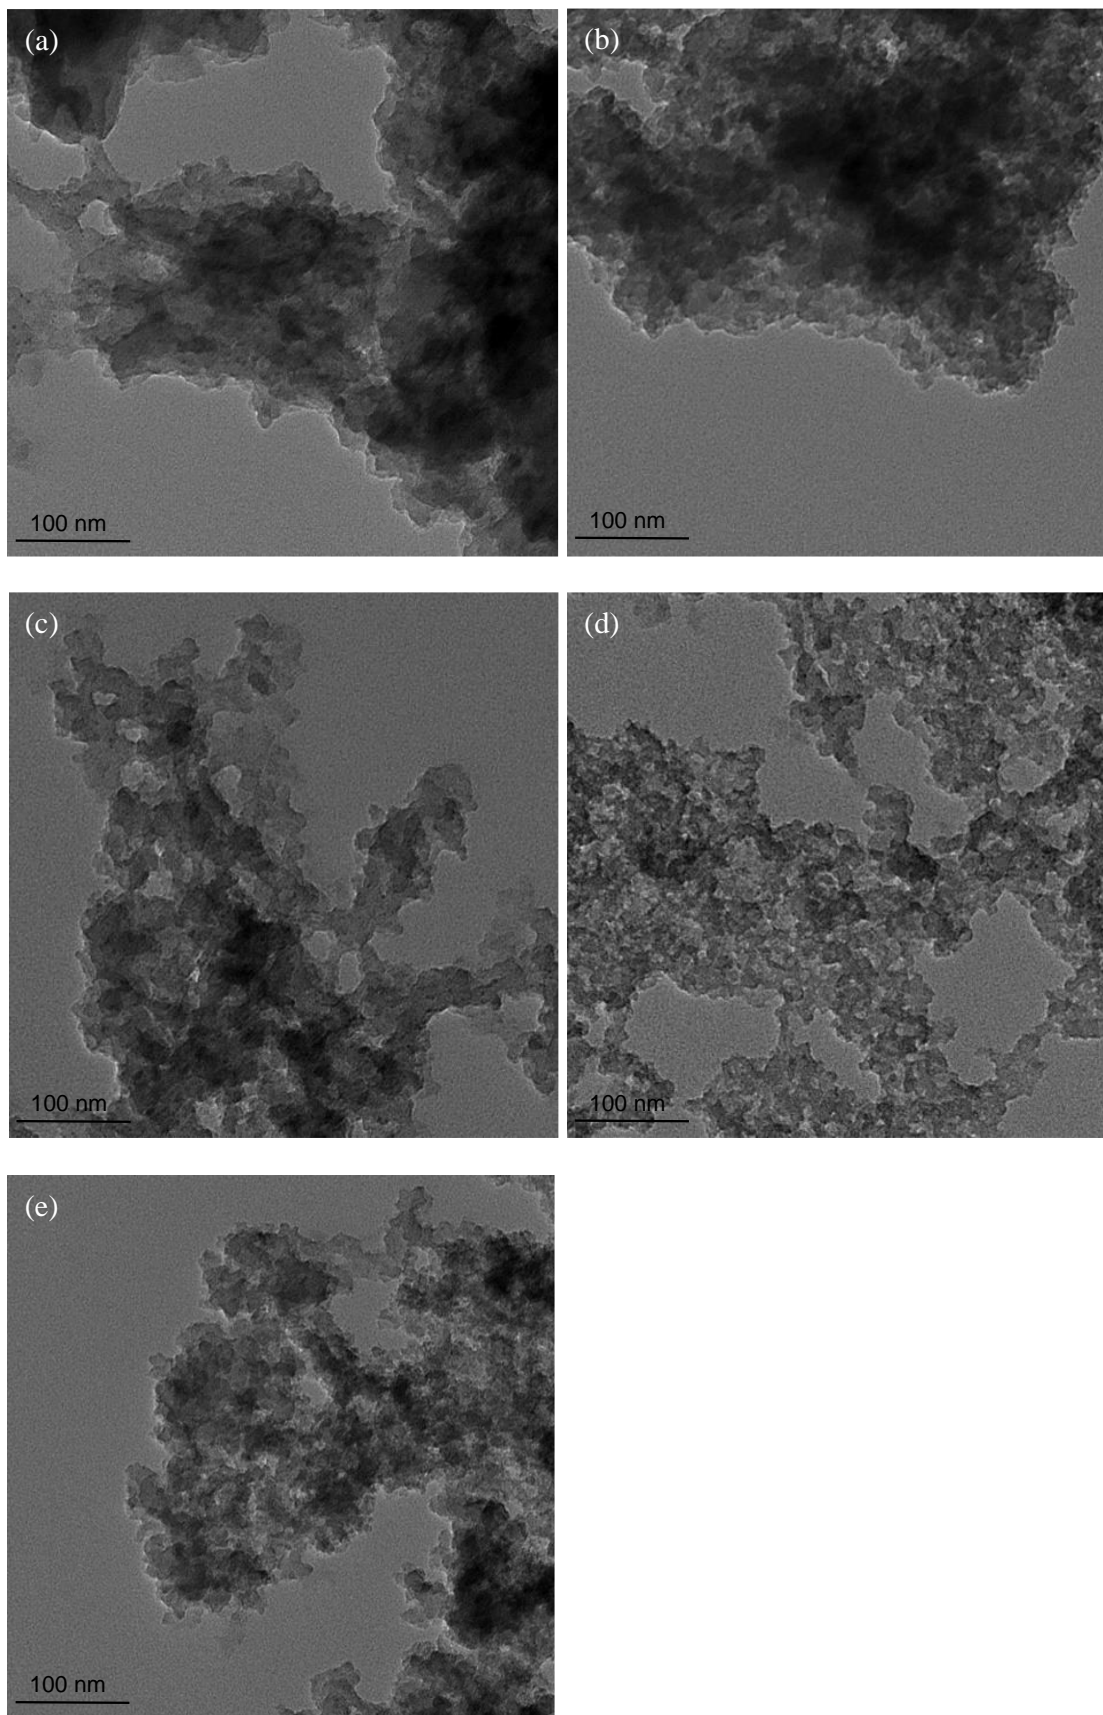

Fig. S2 TEM of (a) CTF-pDCB-1, (b) CTF-mDCB-1, (c) CTF-pDCB-10, (d) CTF-mDCB-10 and (e) CTF-DCBP-10.

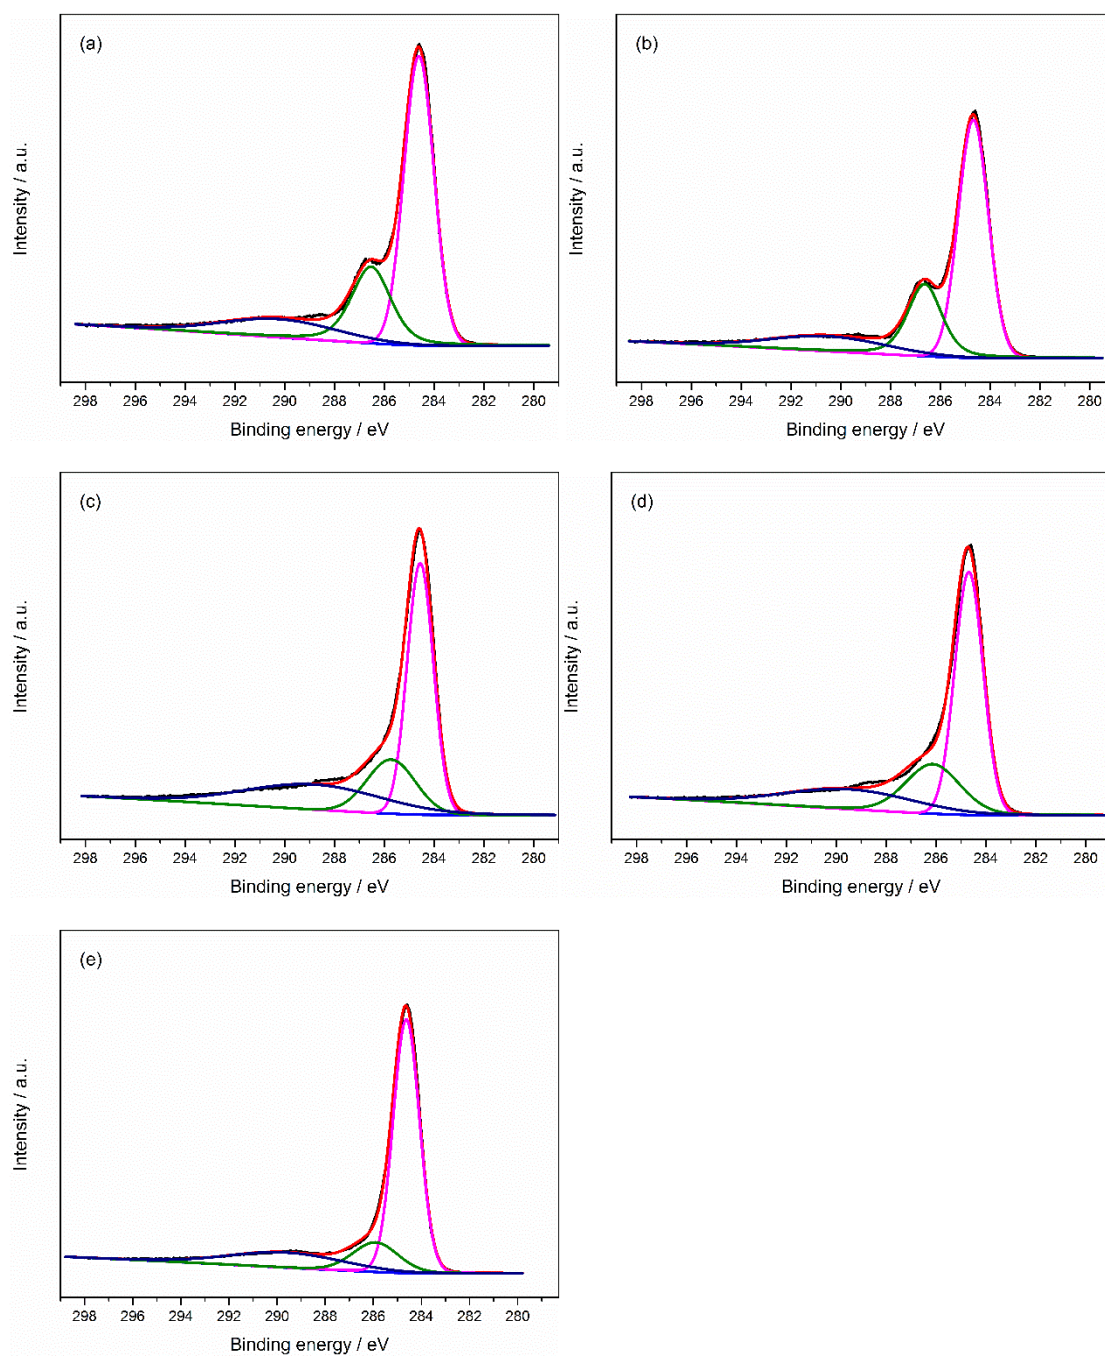

Fig. S3 C 1s peak of (a) CTF-pDCB-1, (b) CTF-mDCB-1, (c) CTF-pDCB-10, (d) CTF-mDCB-10 and (e) CTF-DCBP-10 at high resolution.



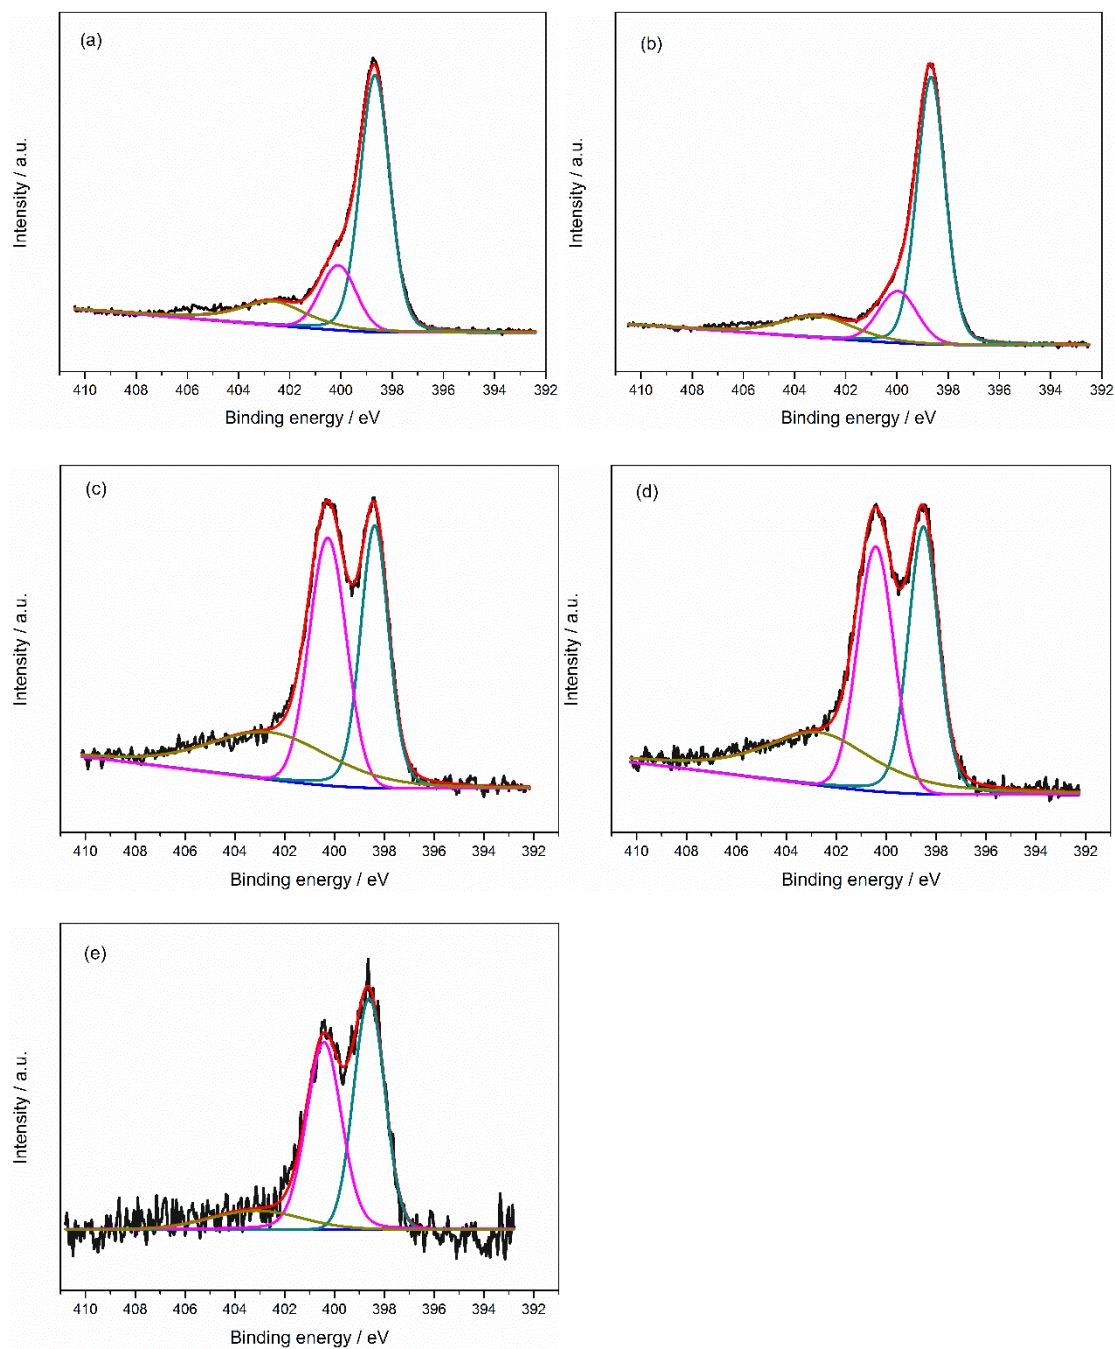

Fig. S4 N 1s peak of (a) CTF-pDCB-1, (b) CTF-mDCB-1, (c) CTF-pDCB-10, (d) CTF-mDCB-10 and (e) CTF-DCBP-10 at high resolution.



Table S1 The content of different types of C <sup>a</sup>

| Entry | Sample      | C-C (%) | C-N (%) | C-O (%) |
|-------|-------------|---------|---------|---------|
| 1     | CTF-pDCB-1  | 60.5    | 24.8    | 14.7    |
| 2     | CTF-mDCB-1  | 60.4    | 24.9    | 14.7    |
| 3     | CTF-pDCB-10 | 52.0    | 20.7    | 27.3    |
| 4     | CTF-mDCB-10 | 55.6    | 23.4    | 21.0    |
| 5     | CTF-DCBP-10 | 68.2    | 14.4    | 17.4    |

<sup>a</sup> Determined by XPS.

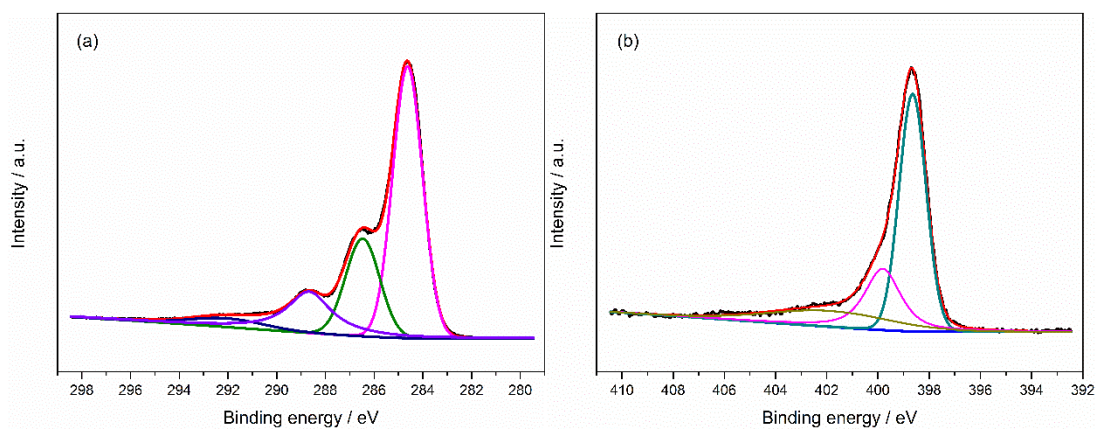

Fig. S5 (a) C 1s peak and (b) N 1s peak of CTF-pDCB-1 after reaction at high resolution.

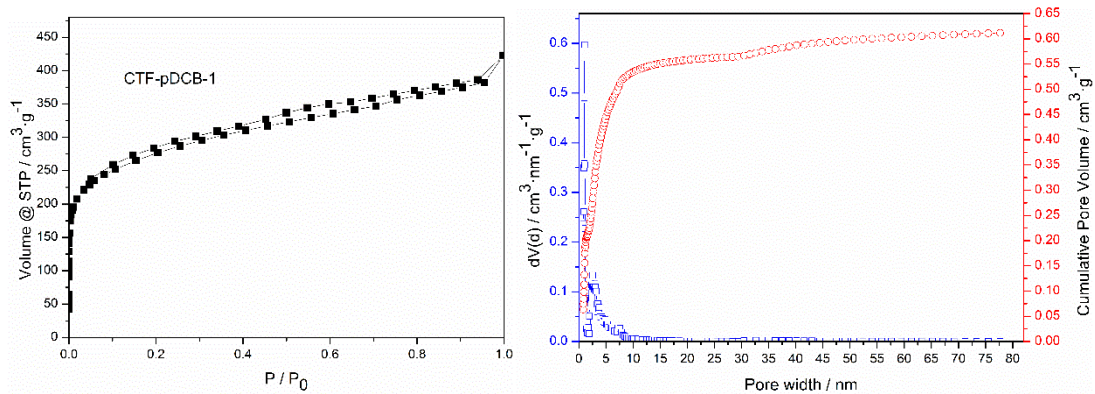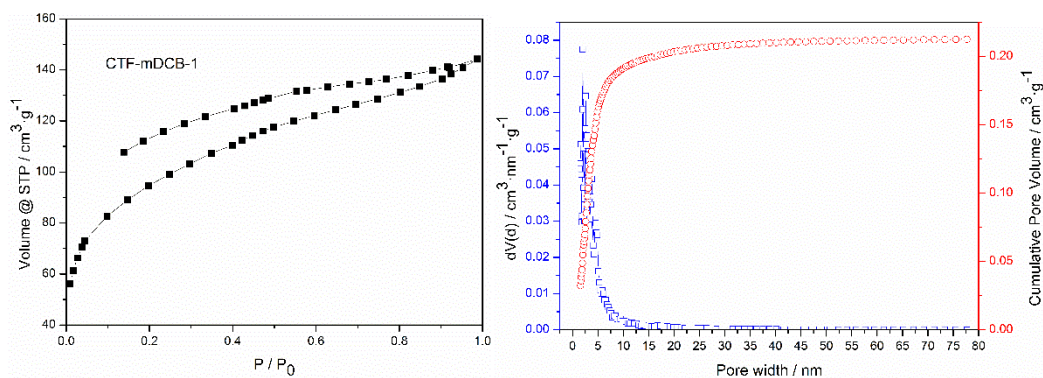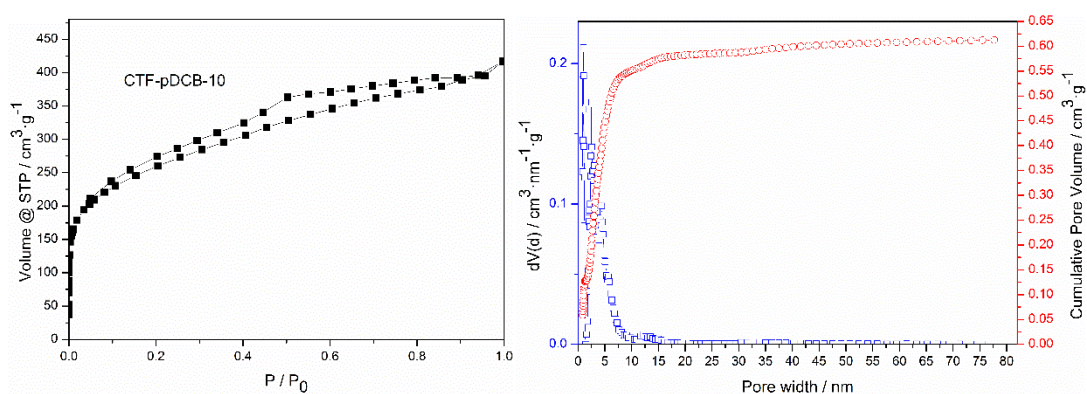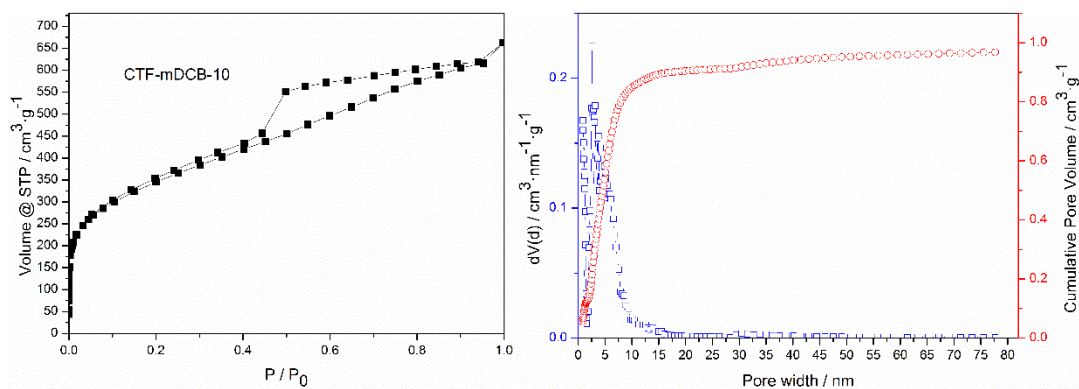

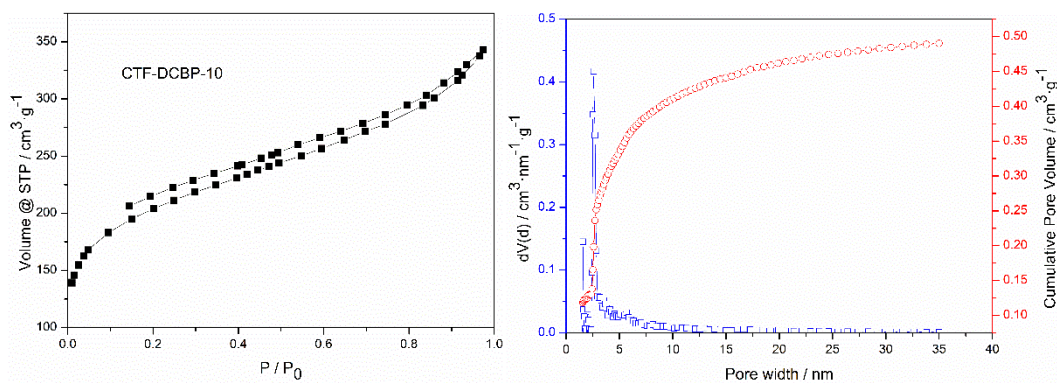

Fig. S6 The N<sub>2</sub> sorption isotherms and the pore size distributions of CTFs.

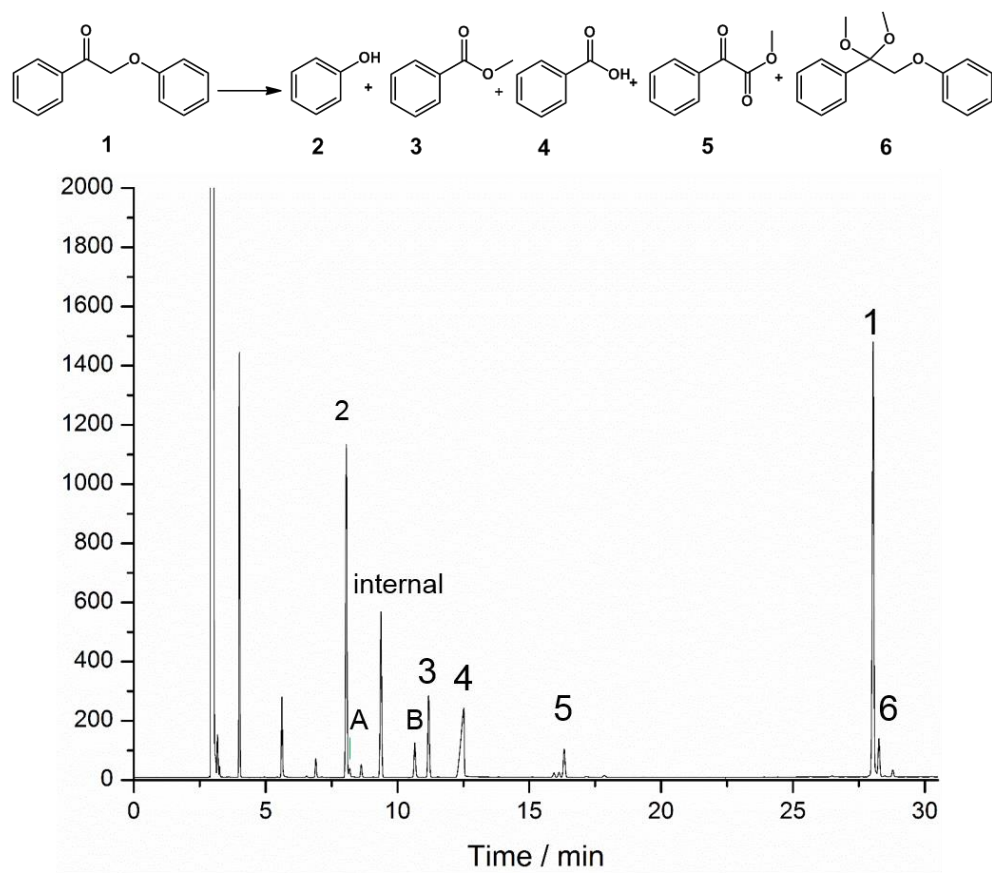

Fig. S7 The products of catalytically oxidative cleavage of lignin model compound **1**. A had the same retention time with phenyl formate and B had the same retention time with phenylglyoxal.

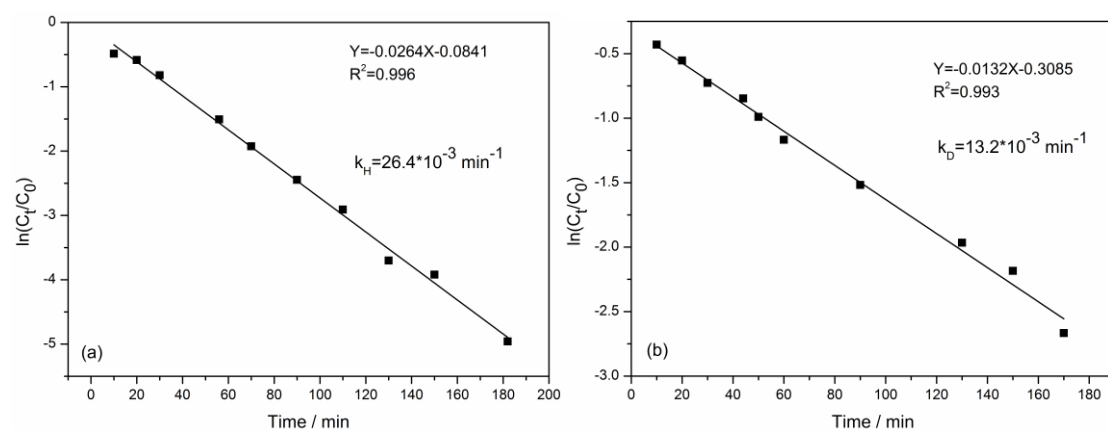

Fig. S8 The linear fit of  $\ln(C_t/C_0)$  against the reaction time of (a) 2-phenoxyacetophenone, (b) Deuterium-labeling 2-phenoxyacetophenone,  $C_t/C_0$  was defined as the ratio of the concentration at  $t$  and initial of the substrate. Reaction conditions: 0.4 mmol of substrate, 40 mg of CTF-pDCB-1, 5 mL of methanol, 140 °C, 0.5 MPa of  $O_2$ , internal standard: 20.3 mg of p-dichlorobenzene.

Table S2 ZnCl<sub>2</sub> as catalyst for the oxidative cleavage of lignin model compound **1**<sup>a</sup>

| Entry | Catalyst          | Conv.<br>(%) | Product distribution (%) |     |      |   |      |        | Selectivity<br>of cleavage<br>products<br>(%) |
|-------|-------------------|--------------|--------------------------|-----|------|---|------|--------|-----------------------------------------------|
|       |                   |              | 2                        | 3   | 4    | 5 | 6    | others |                                               |
| 1     | ZnCl <sub>2</sub> | 24.6         | 44.7                     | 3.1 | 38.1 | 0 | 13.3 | 0.8    | 85.9                                          |

<sup>a</sup> Reaction conditions: 0.4 mmol of substrate, 4.4 mg of ZnCl<sub>2</sub>, 5 mL of methanol, 140 °C, 2 h, 0.5 MPa of O<sub>2</sub>. Selectivity of cleavage products was presented as the amount of (2 + 3 + 4 + 5) in product distribution. Others include some unidentified and undetected compounds that were regarded as uncleavage products.

Table S3 Different reaction atmosphere for the catalytic cleavage of lignin model compound **1**<sup>a</sup>

| Entry | Atmosphere                     | Conv.<br>(%) | Product distribution (%) |      |      |     |      |        | Selectivity<br>of cleavage<br>products<br>(%) |
|-------|--------------------------------|--------------|--------------------------|------|------|-----|------|--------|-----------------------------------------------|
|       |                                |              | 2                        | 3    | 4    | 5   | 6    | others |                                               |
| 1     | N <sub>2</sub>                 | 25.1         | 30.7                     | 3.8  | 0    | 0   | 49.5 | 16.0   | 34.5                                          |
| 2     | N <sub>2</sub> /O <sub>2</sub> | 71.3         | 46.8                     | 14.3 | 22.9 | 5.4 | 3.2  | 7.4    | 89.4                                          |

<sup>a</sup> Reaction conditions: 0.4 mmol of substrate, 40 mg of CTF-pDCB-1, 5 mL of methanol, 140 °C, 2 h. Selectivity of cleavage products was presented as the amount of (2 + 3 + 4 + 5) in product distribution. Others include some unidentified and undetected compounds that were regarded as uncleavage products.

Table S4 The catalytic conversion of lignin model compound **1** over the catalysts <sup>a</sup>

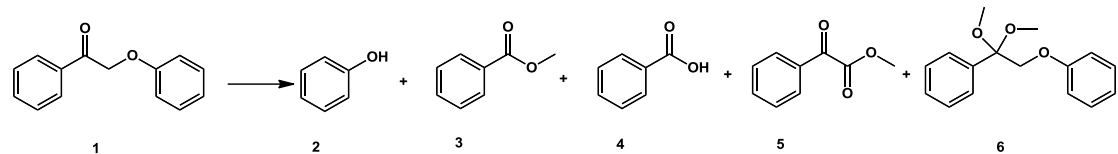

| Entry           | Catalyst       | Conv.<br>(%) | Product yield (%) |      |      |      |      | Selectivity (%) |       |
|-----------------|----------------|--------------|-------------------|------|------|------|------|-----------------|-------|
|                 |                |              | 2                 | 3    | 4    | 5    | 6    | 2               | 3+4+5 |
| 1               | Blank          | 16.9         | 11.0              | 0.1  | 8.5  | 0    | 3.0  | 65.1            | 50.9  |
| 2               | CTF-pDCB-1     | 66.8         | 54.4              | 13.6 | 34.2 | 4.8  | 3.0  | 81.4            | 78.7  |
| 3               | CTF-mDCB-1     | 51.5         | 32.2              | 8.3  | 18.1 | 2.4  | 11.0 | 62.5            | 55.9  |
| 4               | CTF-pDCB-10    | 74.5         | 63.7              | 12.9 | 35.9 | 9.5  | 3.6  | 85.5            | 78.3  |
| 5               | CTF-mDCB-10    | 89.0         | 65.0              | 17.2 | 29.0 | 11.3 | 2.8  | 73.0            | 64.6  |
| 6               | CTF-DCBP-10    | 55.6         | 36.4              | 6.6  | 23.8 | 2.4  | 8.3  | 65.5            | 59.0  |
| 7               | Pyridine       | 52.2         | 39.7              | 1.8  | 36.8 | 3.0  | 1.3  | 76.1            | 79.7  |
| 8               | Pyrimidine     | 27.8         | 17.2              | 0.2  | 15.2 | 0    | 1.8  | 61.9            | 55.4  |
| 9 <sup>b</sup>  | 1,3,5-Triazine | 74.5         | 64.2              | 3.9  | 24.2 | 1.4  | 0    | 86.2            | 39.6  |
| 10 <sup>c</sup> | CTF-pDCB-1     | >99          | 83.7              | 27.7 | 44.6 | 14.8 | 0    | 83.7            | 87.1  |

<sup>a</sup> Reaction conditions: 0.4 mmol of substrate, 40 mg of catalyst, 5 mL of methanol, 140 °C, 2 h, 0.5 MPa of O<sub>2</sub>. <sup>b</sup> 18 mg of catalyst, <sup>c</sup> 60 mg of catalyst, 160 °C, 6 h.



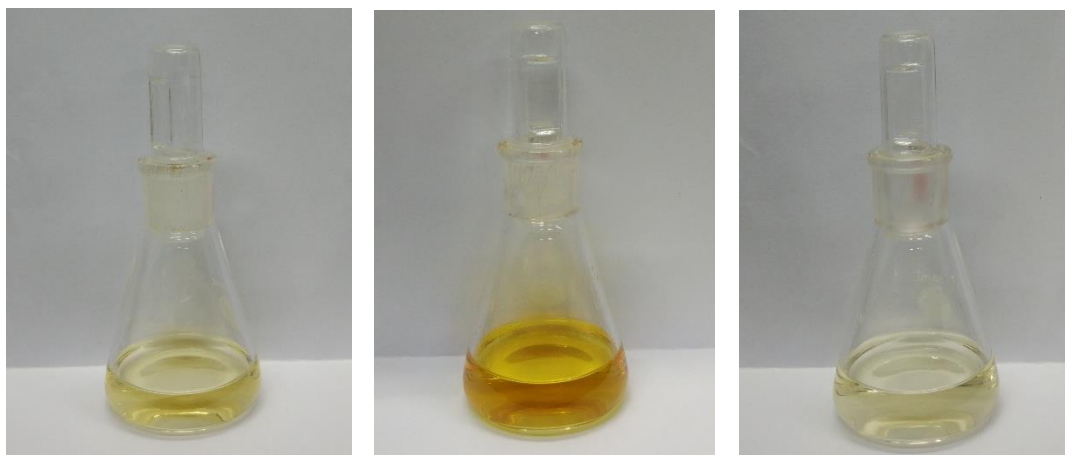

Fig. S9 The color change of the reaction solution (left) after adding the KI aqueous (middle) and titration by  $\text{Na}_2\text{S}_2\text{O}_3$  (right). The color of the solution changed from canary yellow to brown with  $\text{I}^-$  oxidizing to  $\text{I}_2$ , indicating the presence of the substrate peroxide.

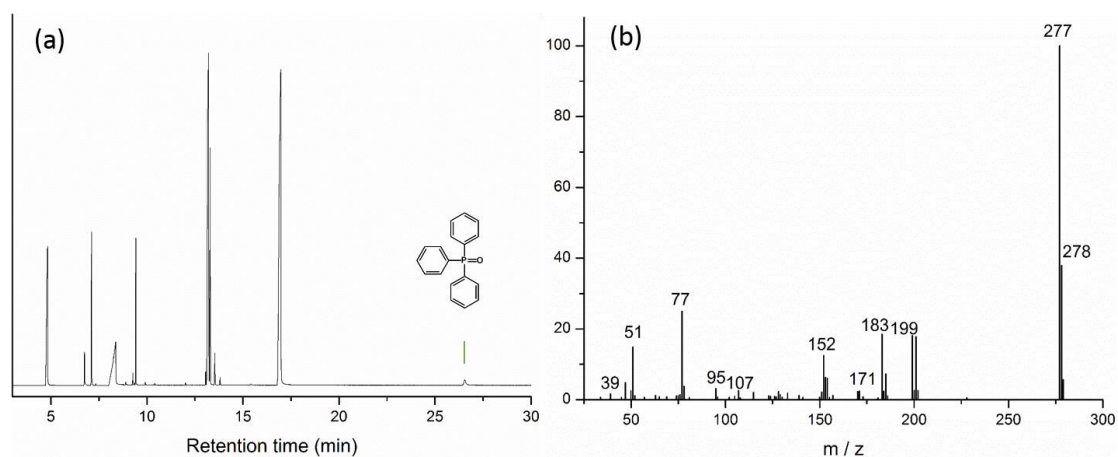

Fig. S10 (a) GC-MS spectrum of the reaction solution with triphenylphosphine added and (b) MS spectrum of triphenylphosphine oxide. Triphenylphosphine oxide was detected, indicating the peroxide was present.

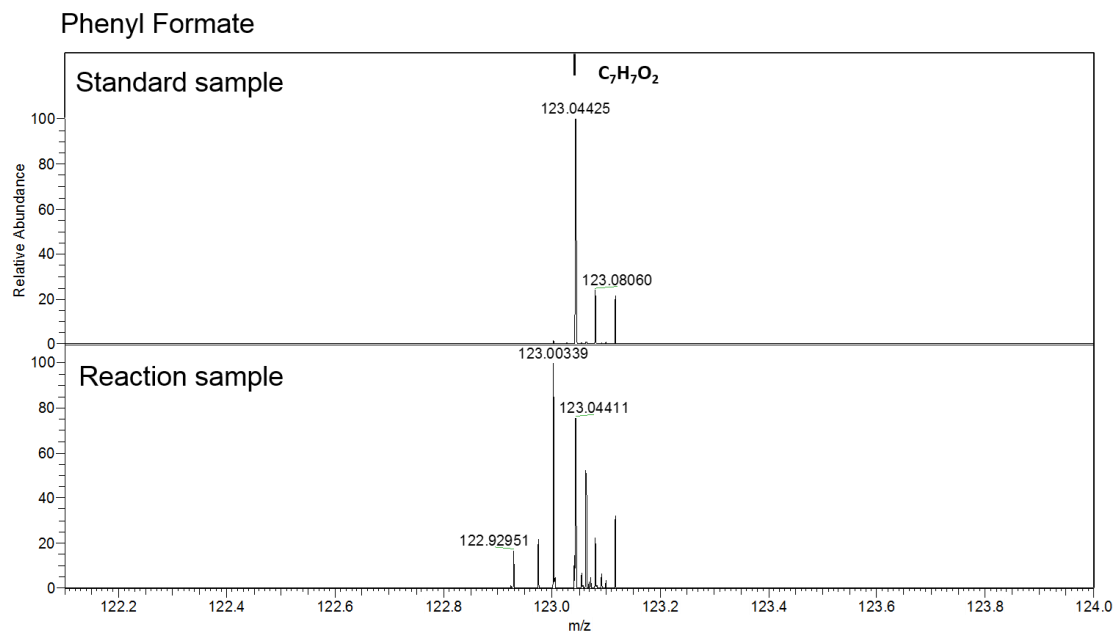

The MS spectra of standard phenyl formate and reaction sample

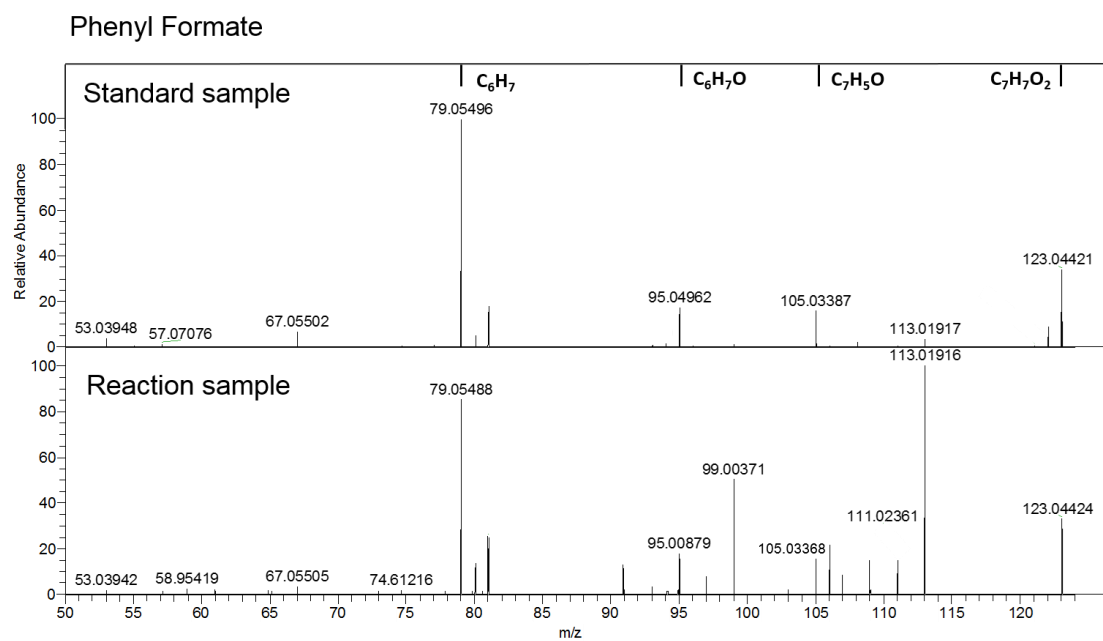

The MS<sup>2</sup> spectra of standard phenyl formate and reaction sample

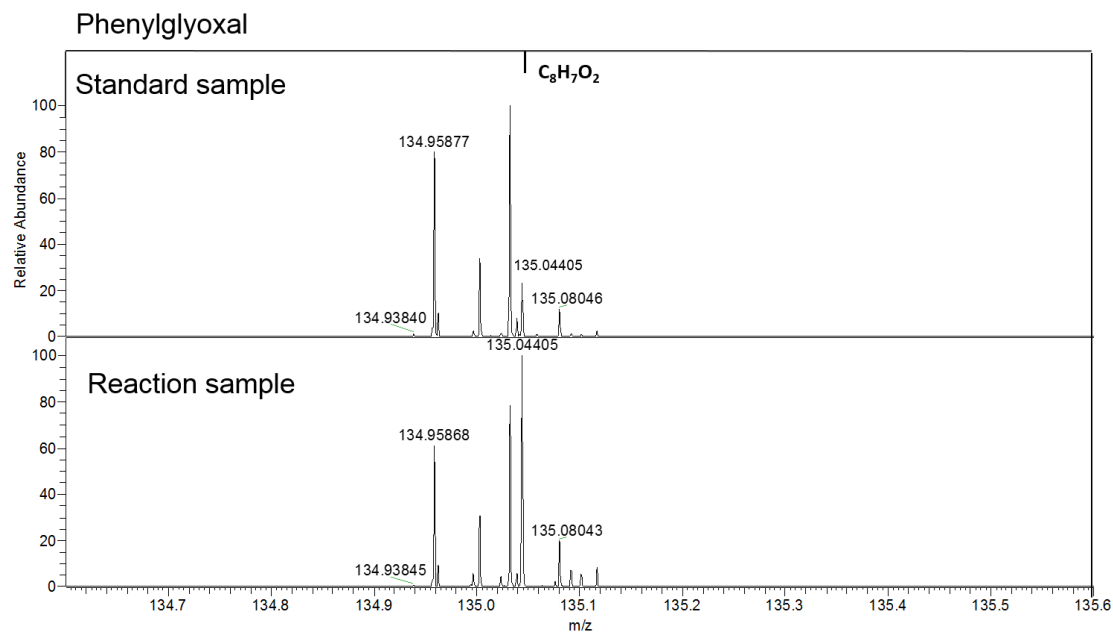

The MS spectra of standard phenylglyoxal and reaction sample

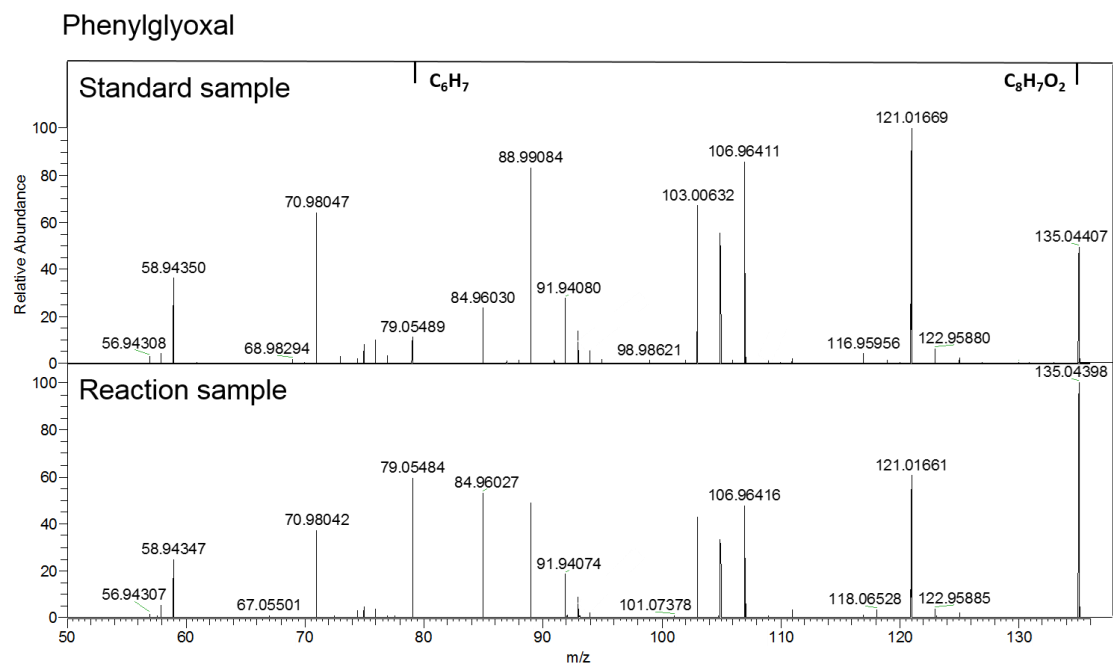

The MS<sup>2</sup> spectra of standard phenylglyoxal and reaction sample

Fig. S11 The verification of the proposed intermediates phenyl formate and phenylglyoxal by HRMS/MS (ESI, M+H). For the reaction sample, reaction conditions: 0.4 mmol of substrate, 40 mg of CTF-pDCB-1, 5 mL of methanol, 0.5 MPa of O<sub>2</sub>, 140 °C, 2 h.

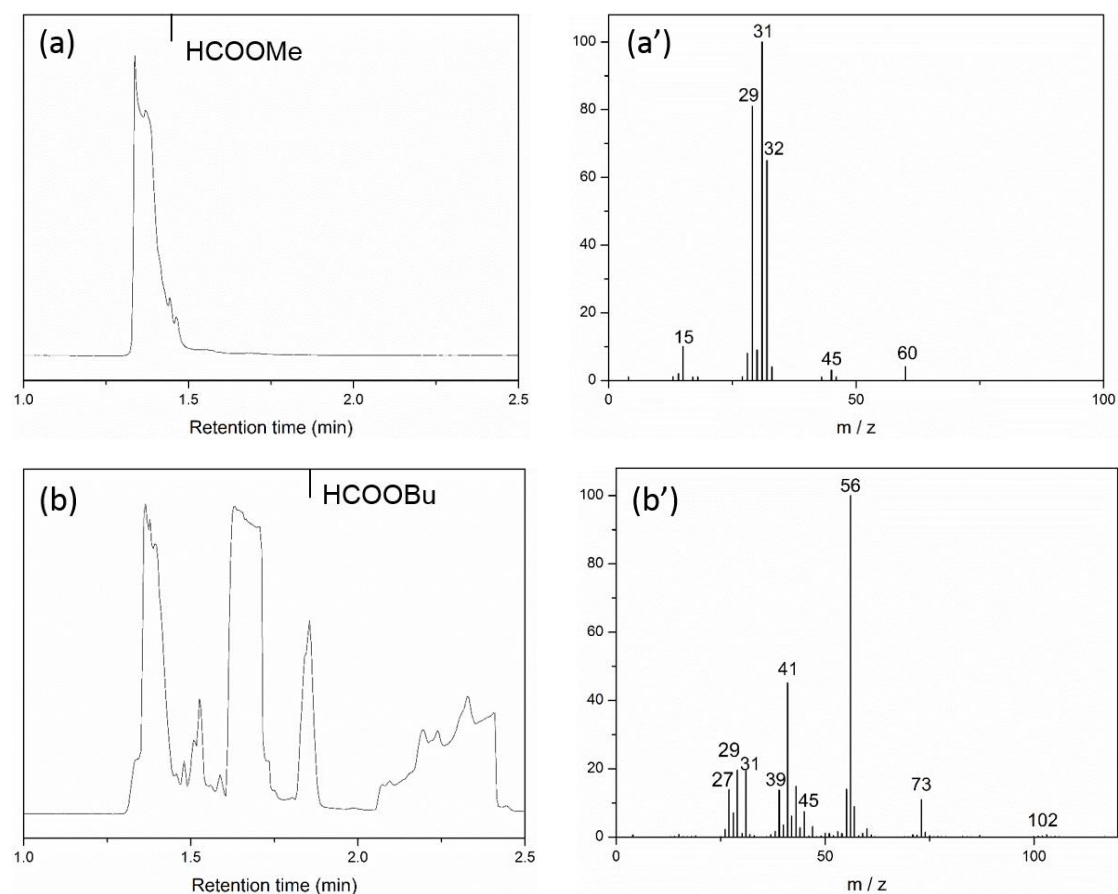

Fig. S12 GC-MS spectra of the oxidation of lignin model compound **1** (a) in methanol and (a') MS spectrum of HCOOMe, (b) in n-butanol and (b') MS spectrum of HCOOBu.

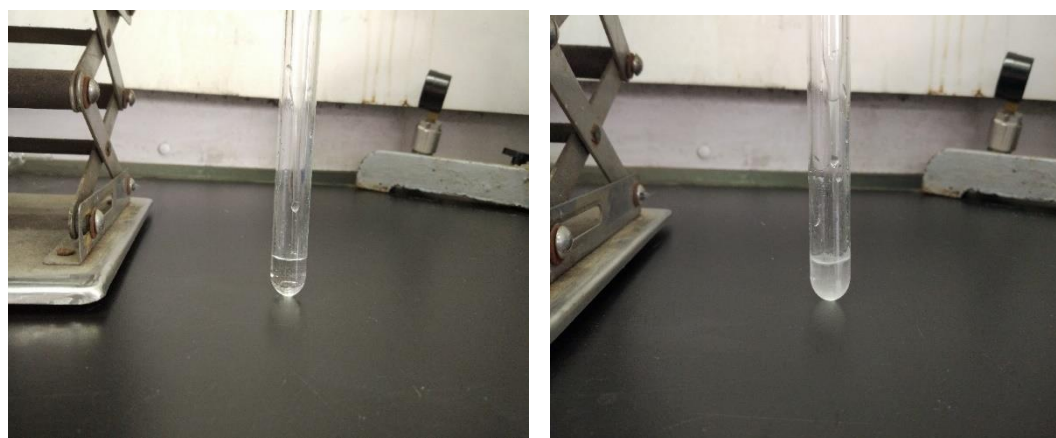

Fig. S13 Limewater images before (left) and after (right) introduction of the reaction gas phase. The limewater was cloudy, indicating the generation of  $\text{CO}_2$  during the reaction.

Table S5 The content of the structural units <sup>a</sup>

|                                                           | Lignin | Oxidized Lignin |
|-----------------------------------------------------------|--------|-----------------|
| Weight (mg)                                               | 40.0   | 40.0            |
| S <sub>2,6</sub> (2H) (peak area ratio to internal)       | 0.43   | 0.11            |
| S' <sub>2,6</sub> (2H) (peak area ratio to internal)      | 0.02   | 0.14            |
| S'' <sub>2,6</sub> (2H) (peak area ratio to internal)     | 0.01   |                 |
| S <sub>condensed</sub> (1H) (peak area ratio to internal) | 0.07   | -               |
| G <sub>2</sub> (1H) (peak area ratio to internal)         | 0.13   | 0.03            |
| G' <sub>2</sub> (1H) (peak area ratio to internal)        | -      | 0.04            |
| Total C <sub>9</sub> units                                | 0.43   | 0.195           |
| β-O-4 α (1H) (peak area ratio to internal)                | 0.20   | 0.02            |
| β-O-4 linkages per C <sub>9</sub> unit                    | 46.5%  | 10.3%           |
| A' (1H) (peak area ratio to internal)                     | 0      | 0.04            |
| A'' (1H) (peak area ratio to internal)                    | 0      | 0.06            |
| A' linkages per C <sub>9</sub> unit                       | 0      | 20.5%           |
| A'' linkages per C <sub>9</sub> unit                      | 0      | 30.8%           |

<sup>a</sup> 10.0 mg of internal (peak area=1.00),

Total C<sub>9</sub> units = (S<sub>2,6</sub> + S'<sub>2,6</sub> + S''<sub>2,6</sub>) / 2 + S<sub>condensed</sub> + G<sub>2</sub> + G'<sub>2</sub>

β-O-4 linkages per C<sub>9</sub> unit = β-O-4 α / Total C<sub>9</sub> units

A' linkages per C<sub>9</sub> unit = A' / Total C<sub>9</sub> units

A'' linkages per C<sub>9</sub> unit = A'' / Total C<sub>9</sub> units

Table S6 The conversion of the β-O-4 ketone bonds <sup>a</sup>

|                                   | Standard oxidized lignin | Oxidized lignin for reaction | Conversion of β-O-4 ketone bonds (%) |
|-----------------------------------|--------------------------|------------------------------|--------------------------------------|
| Weight (mg)                       | 40.0                     | 100.0                        | 80.0                                 |
| A' (peak area ratio to internal)  | 0.04                     | 0.01                         |                                      |
| A'' (peak area ratio to internal) | 0.06                     | 0.04                         |                                      |

<sup>a</sup> Internal: 10.0 mg of pyrazine (peak area=1.00)

After reaction: the conversion of β-O-4 ketone bonds was calculated referred to

internal [(0.06 + 0.04)\*(100 / 40) - (0.04 + 0.01)] / (0.06 + 0.04) / (100 / 40) = 80.0%

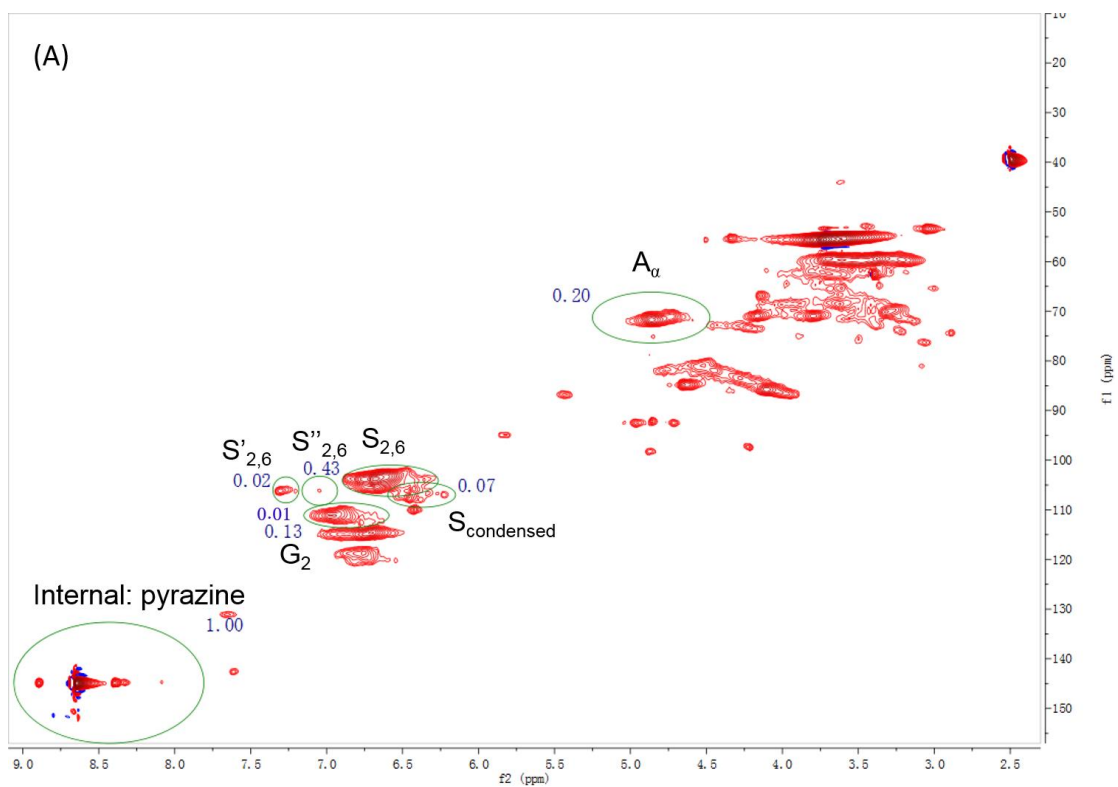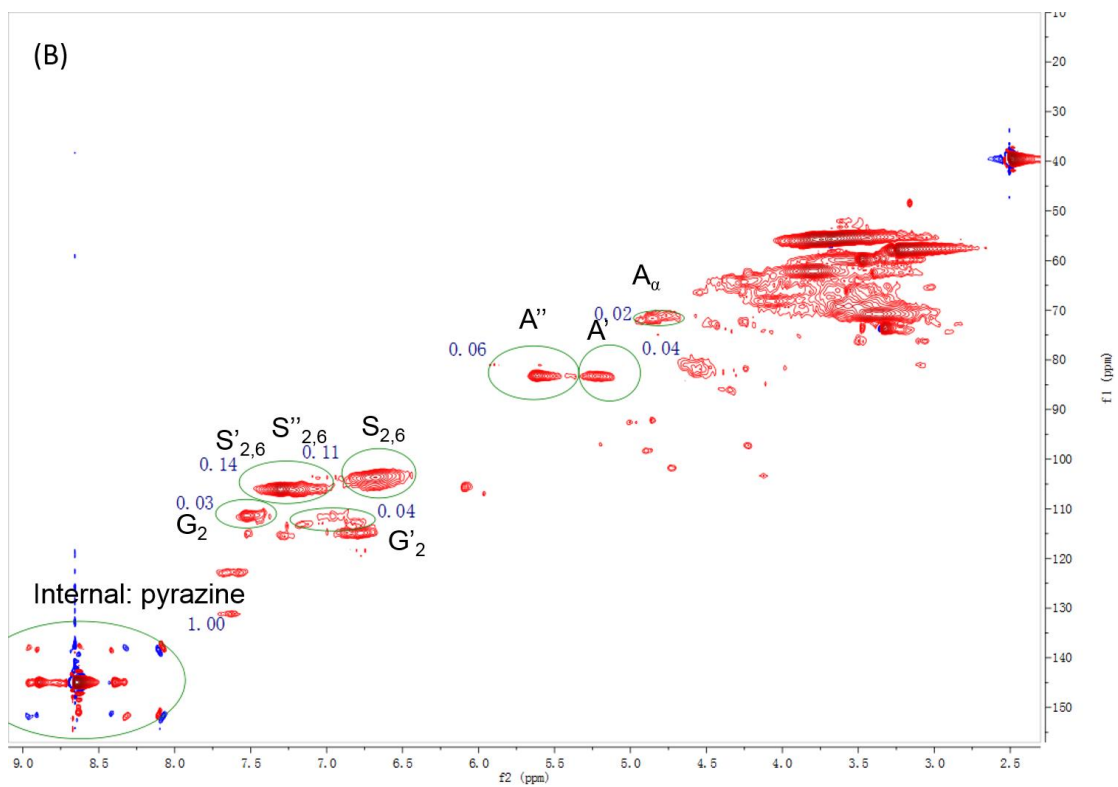



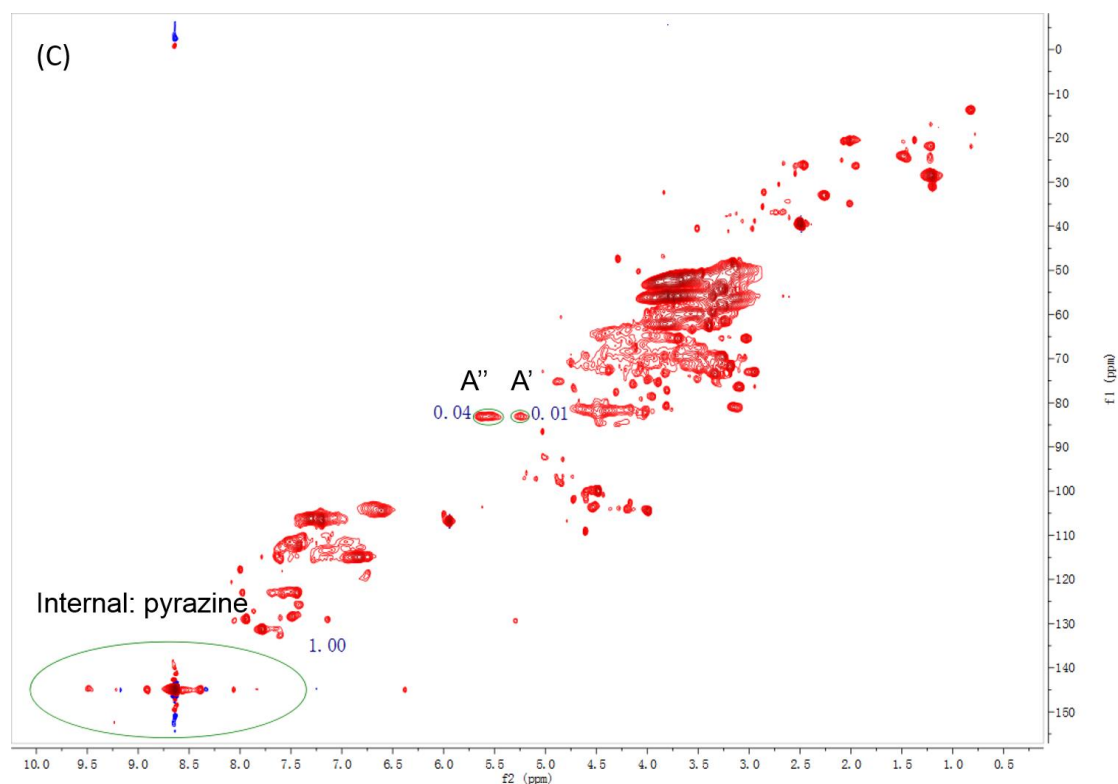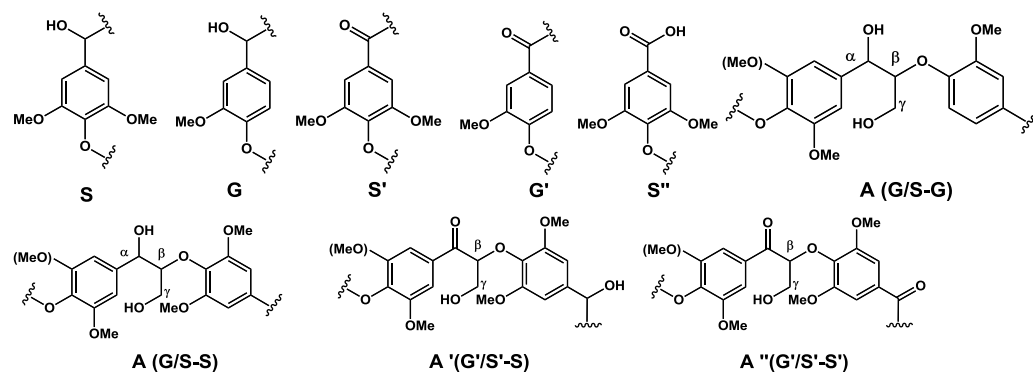

Fig. S14 2D HSQC NMR spectra (in DMSO-*d*<sub>6</sub>) of (A) birch lignin (B) oxidized birch lignin and (C) after the catalytic cleavage reaction. Equivalent internal of pyrazine was added to the solution, the conversion was calculated according to the relative cross peaks areas of A' and A'' to the internal.

## NMR spectra of the compounds.

### $^1\text{H}$ NMR

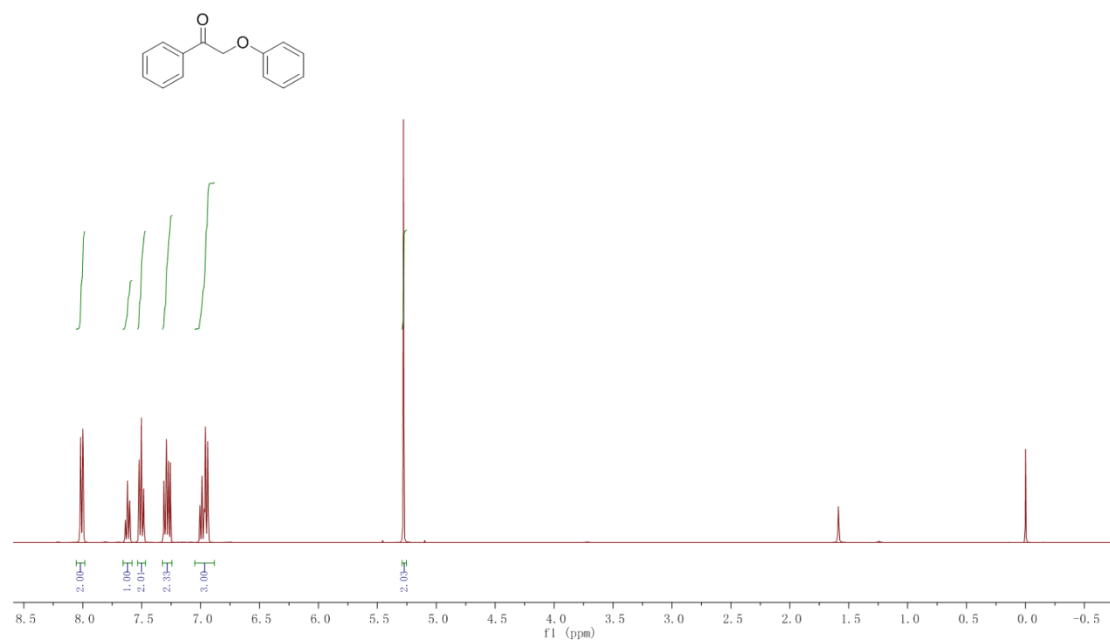

### $^{13}\text{C}$ NMR

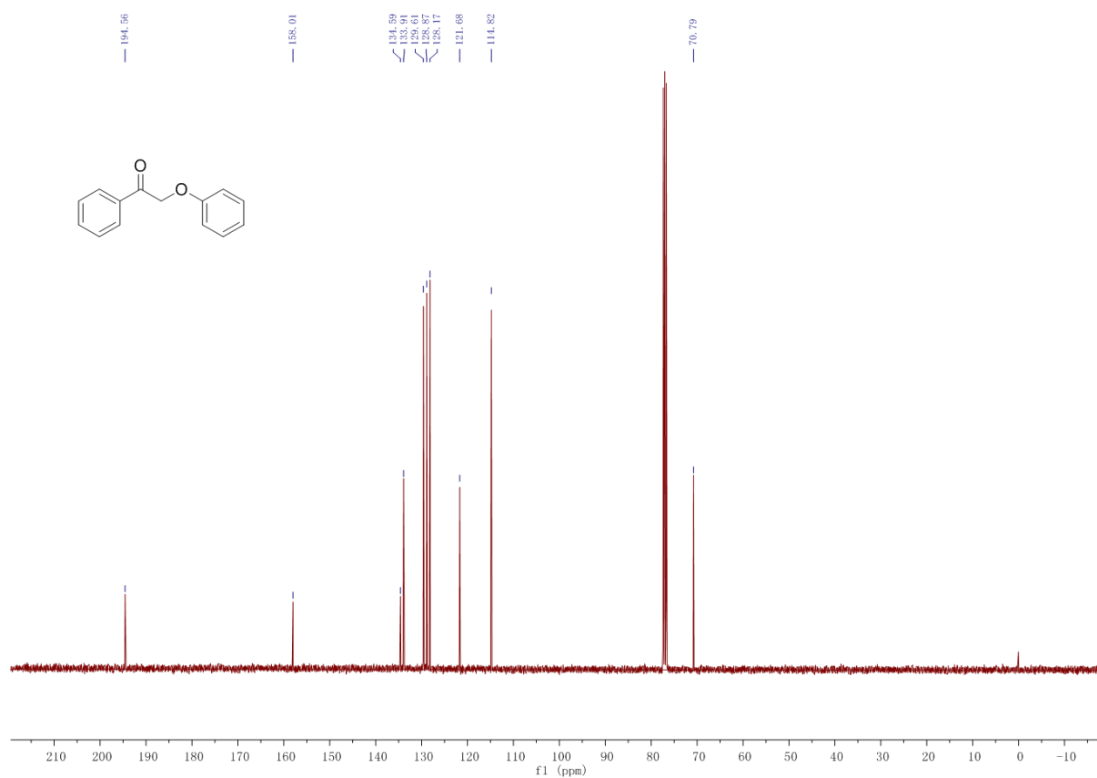

# <sup>1</sup>H NMR

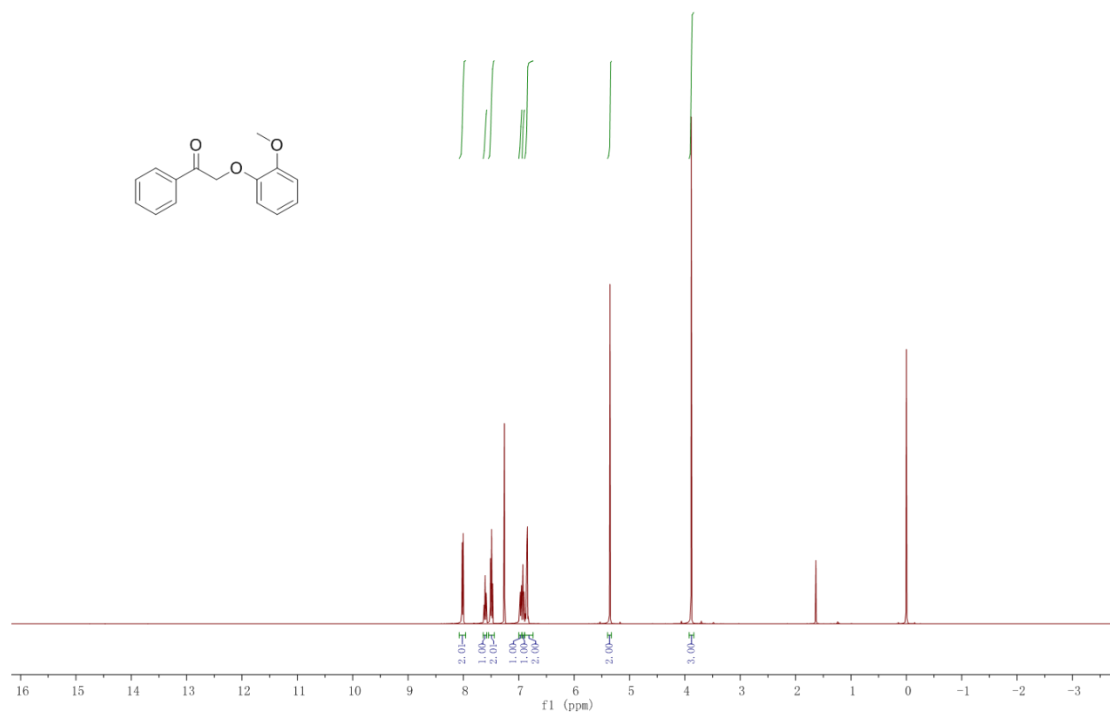

# <sup>13</sup>C NMR

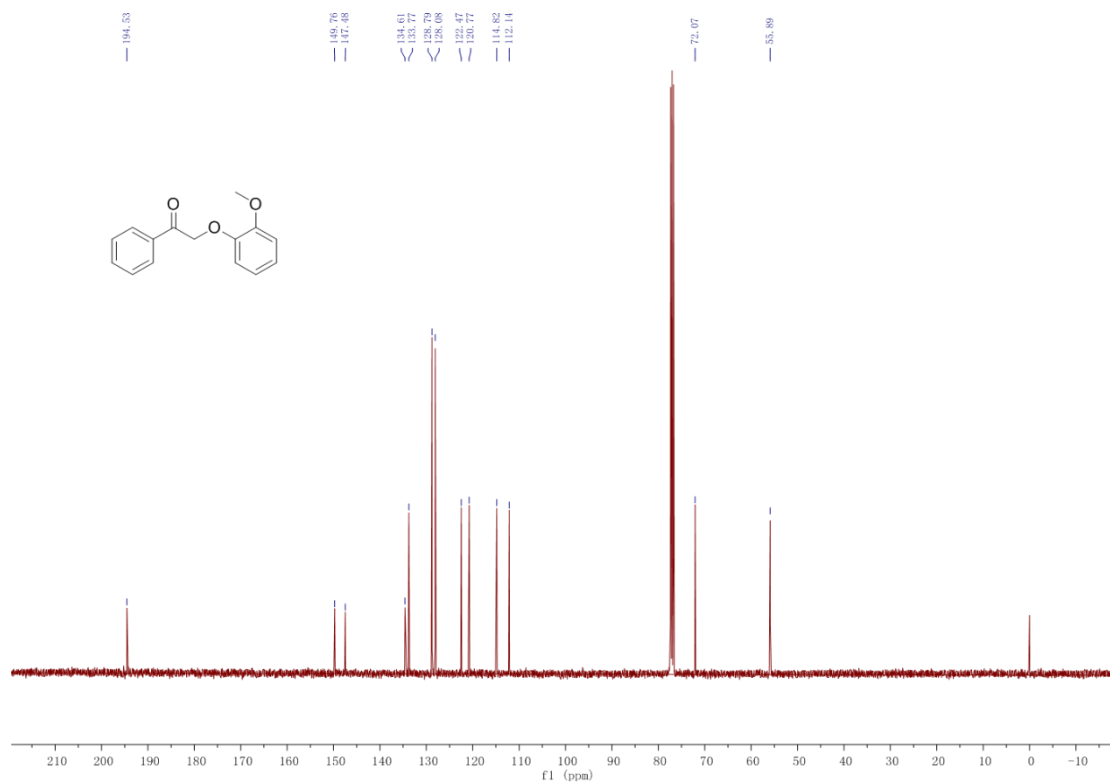

# <sup>1</sup>H NMR

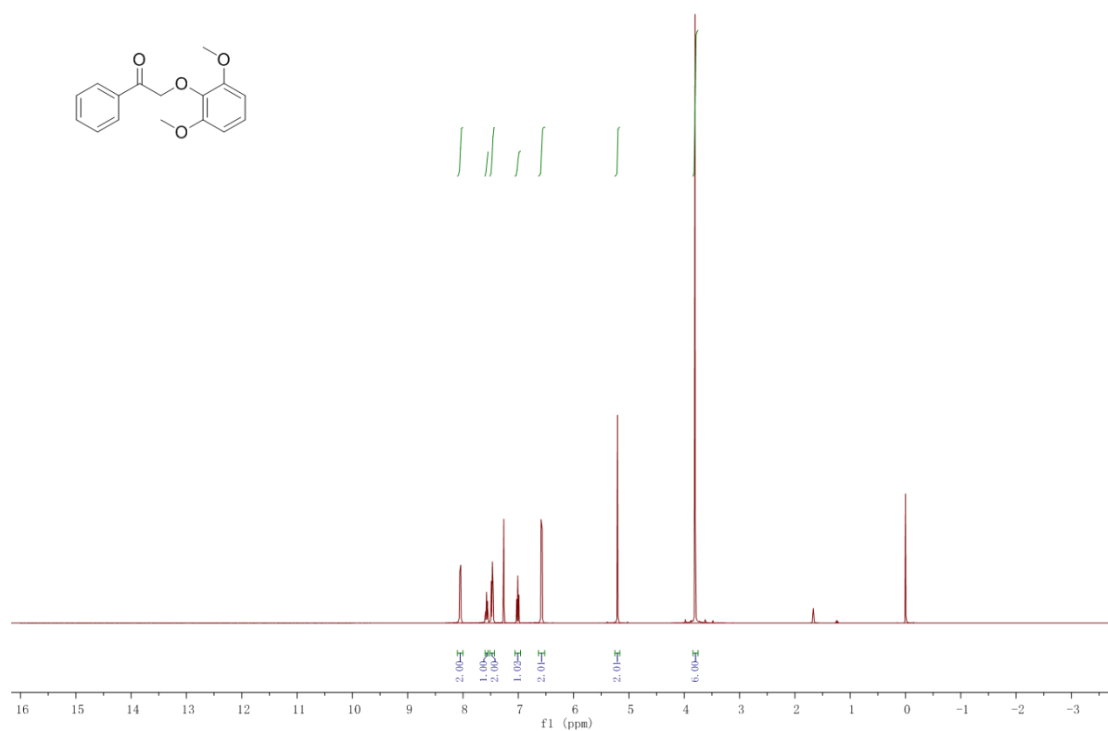

# <sup>13</sup>C NMR

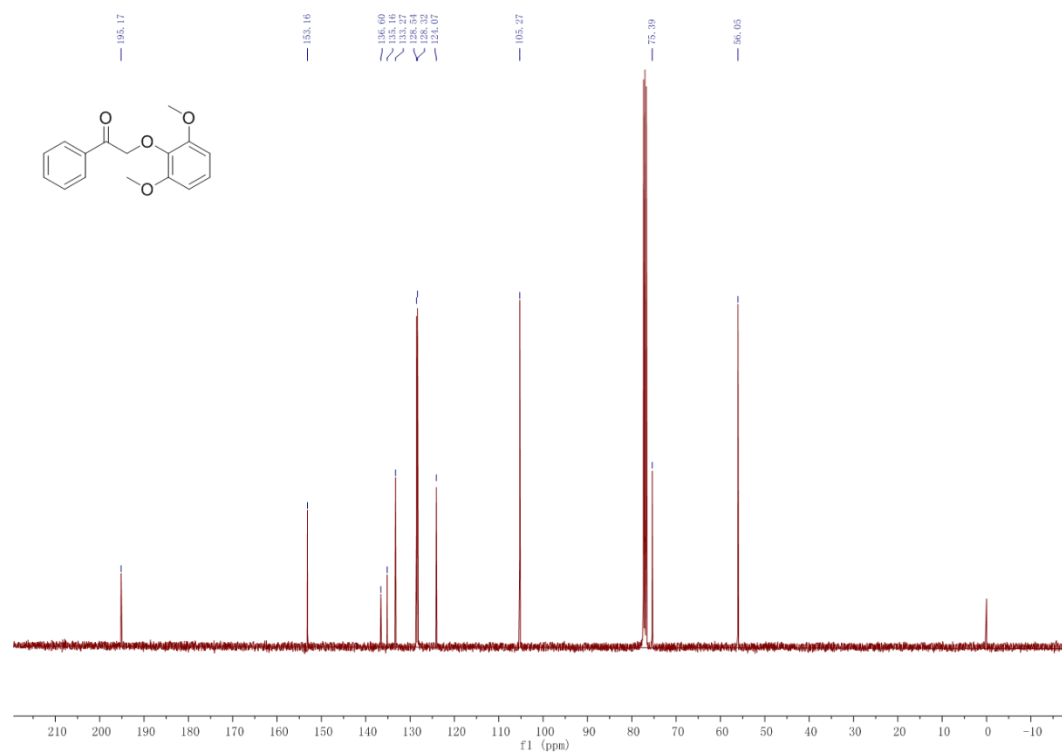

# <sup>1</sup>H NMR

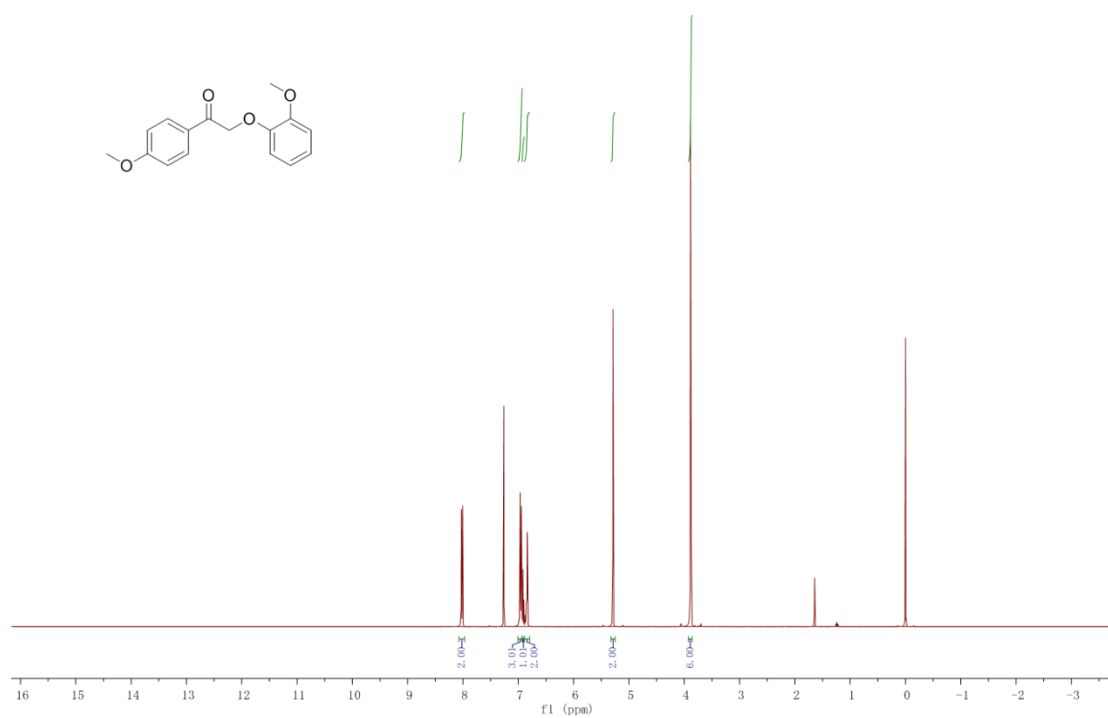

# <sup>13</sup>C NMR

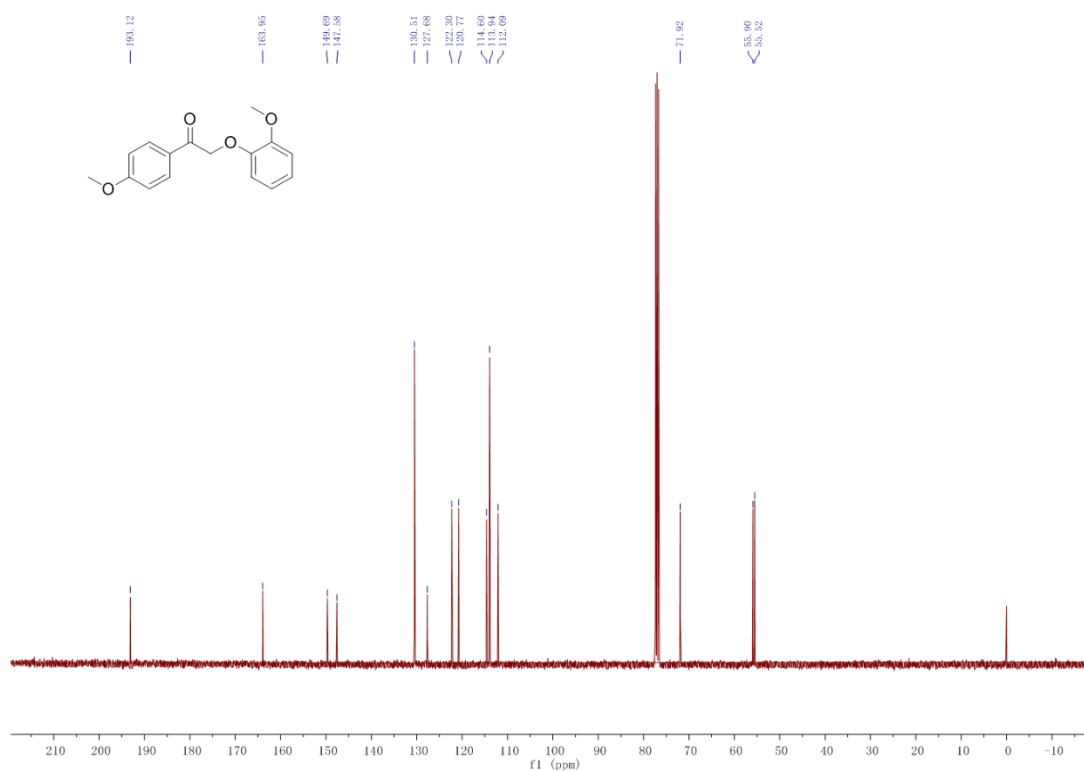

# <sup>1</sup>H NMR

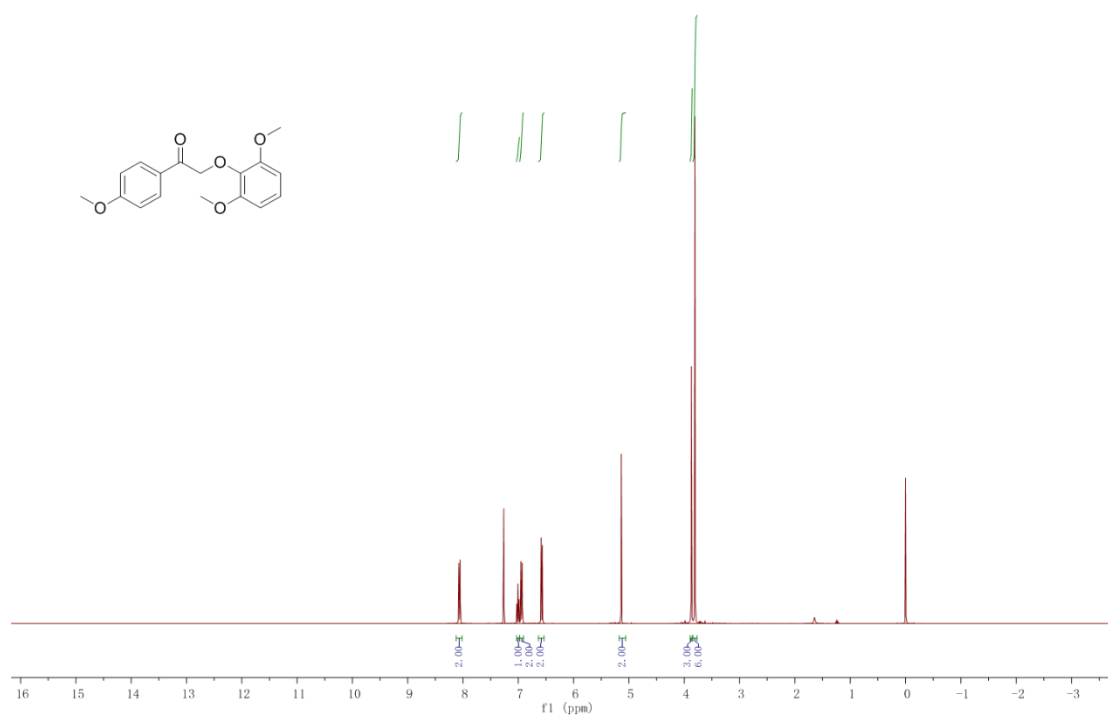

# <sup>13</sup>C NMR

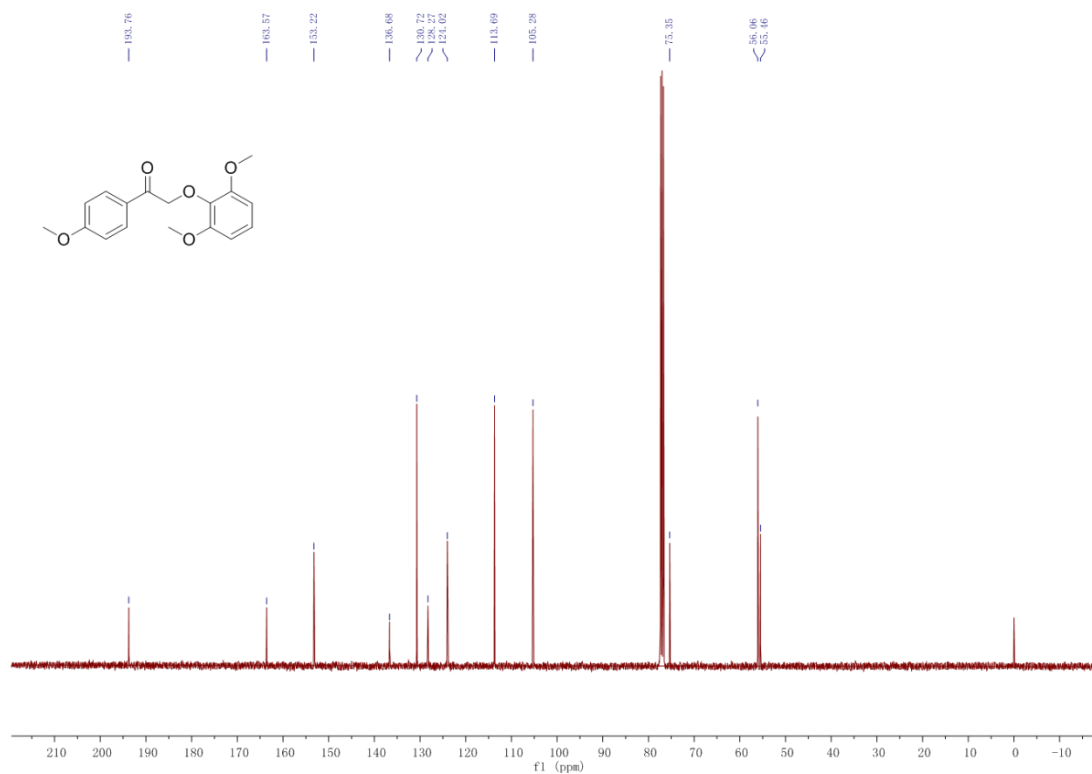



# <sup>1</sup>H NMR

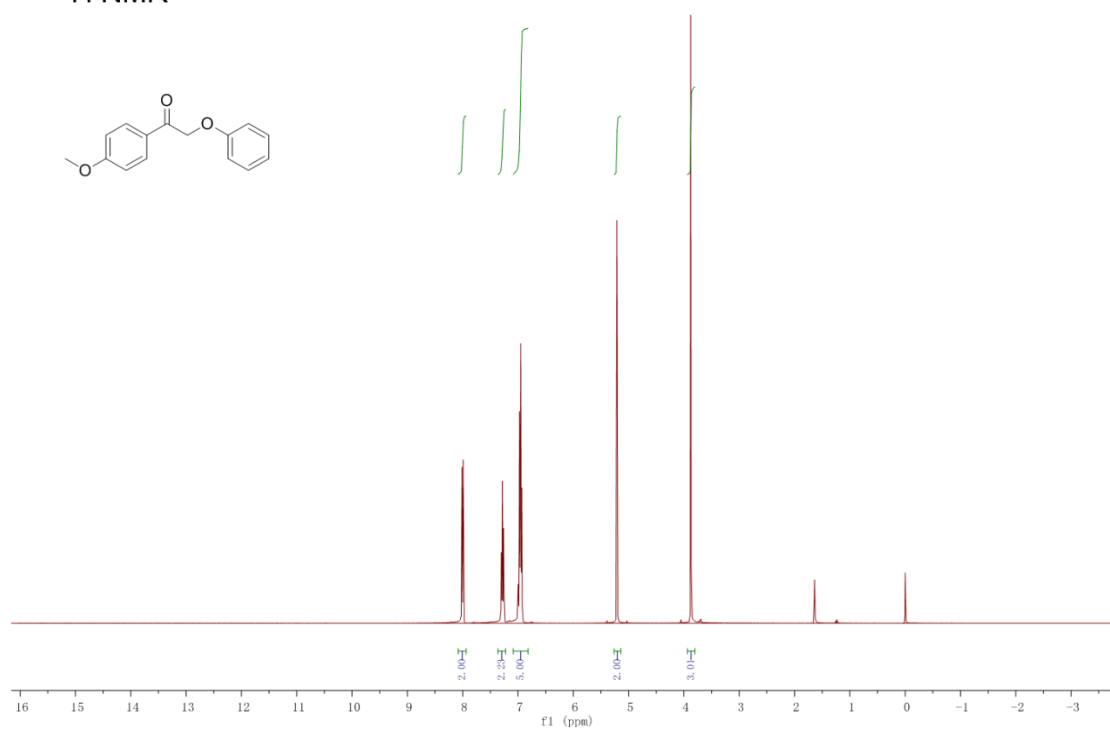

# <sup>13</sup>C NMR

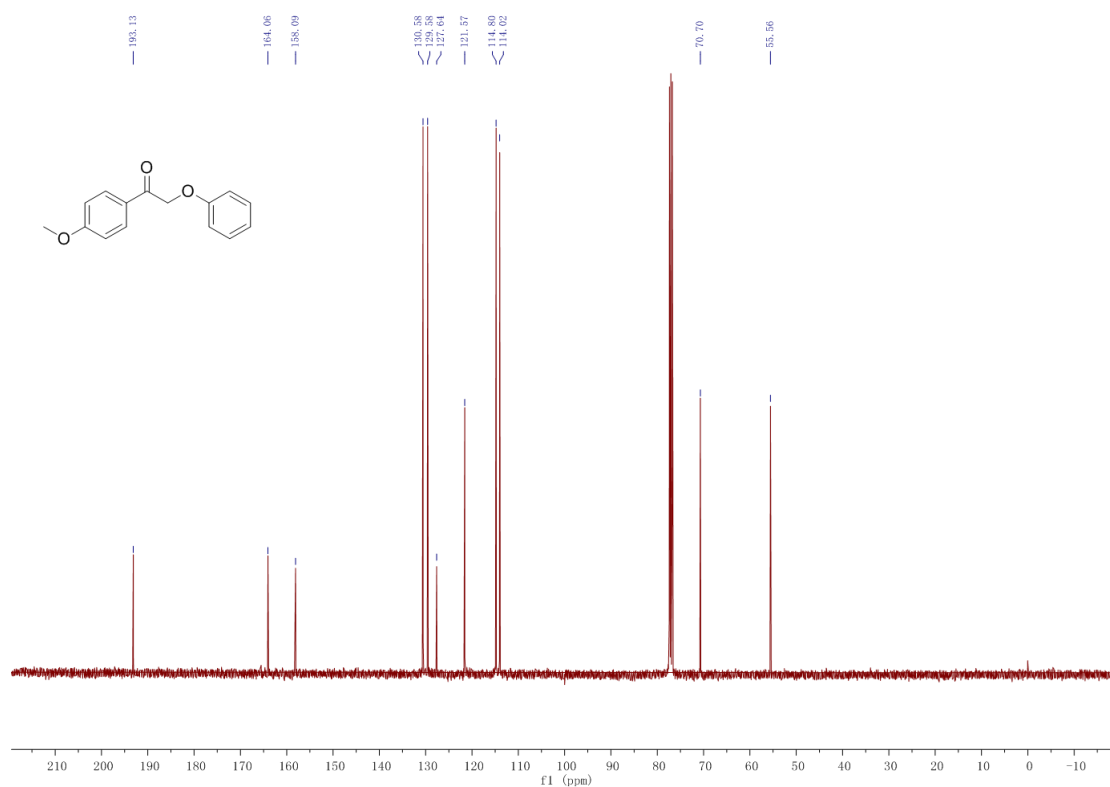

# <sup>1</sup>H NMR

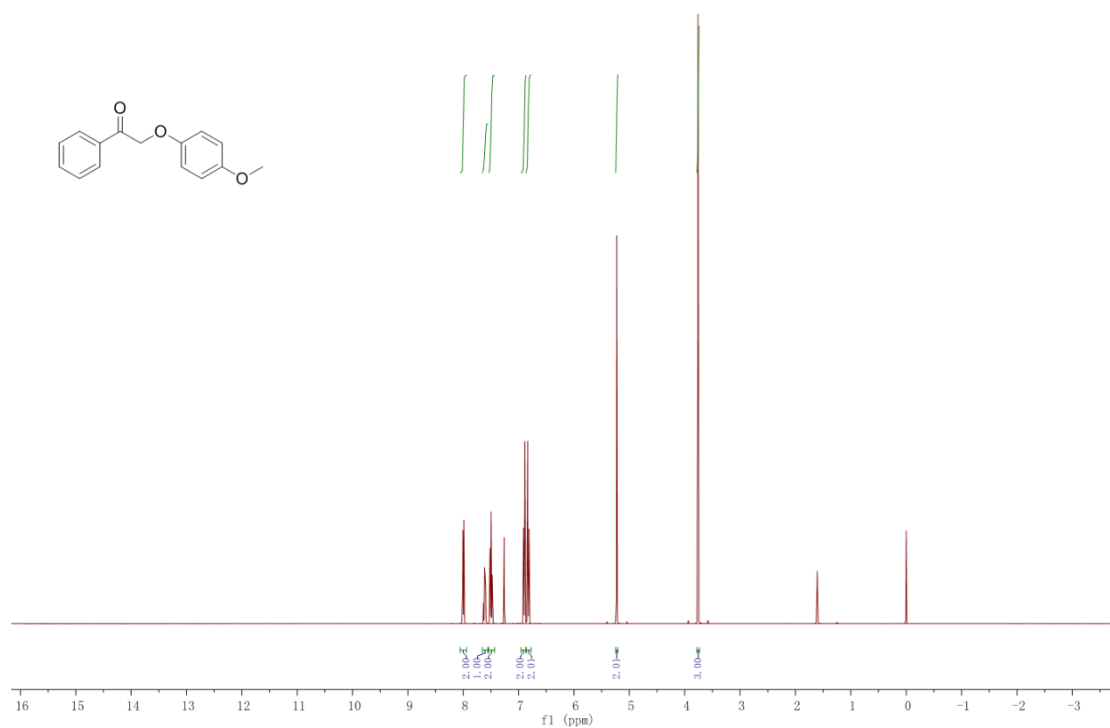

# <sup>13</sup>C NMR

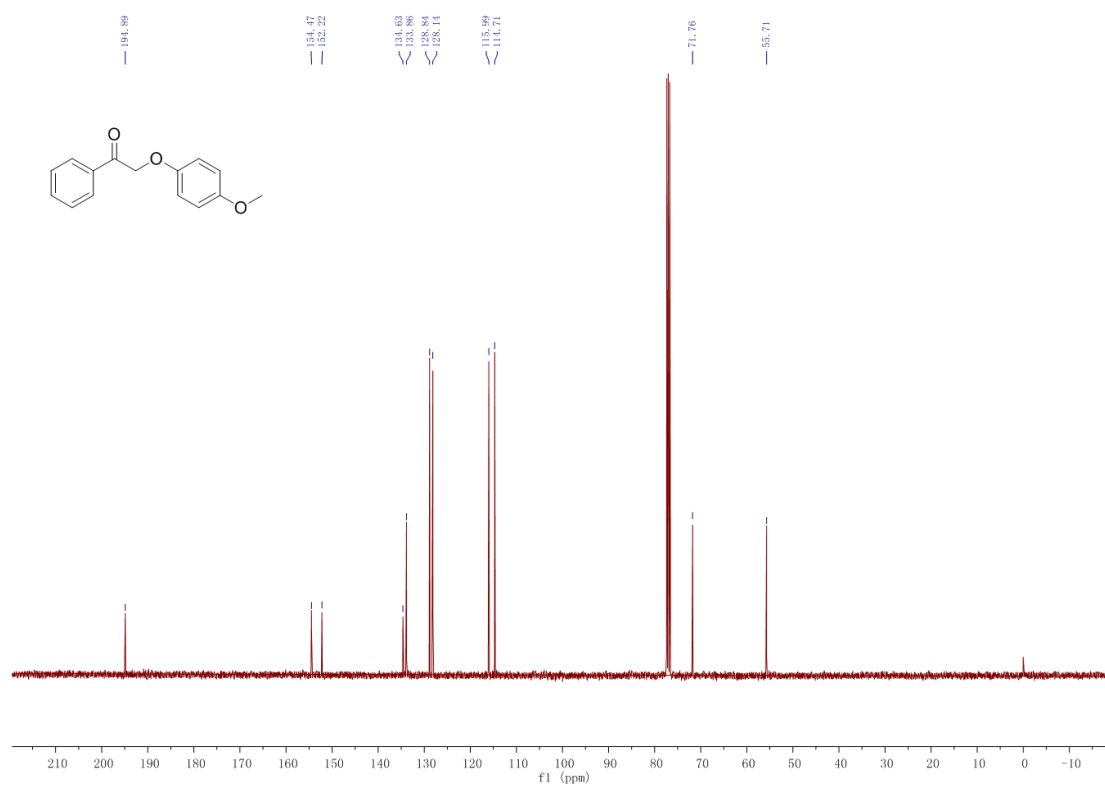

# <sup>1</sup>H NMR

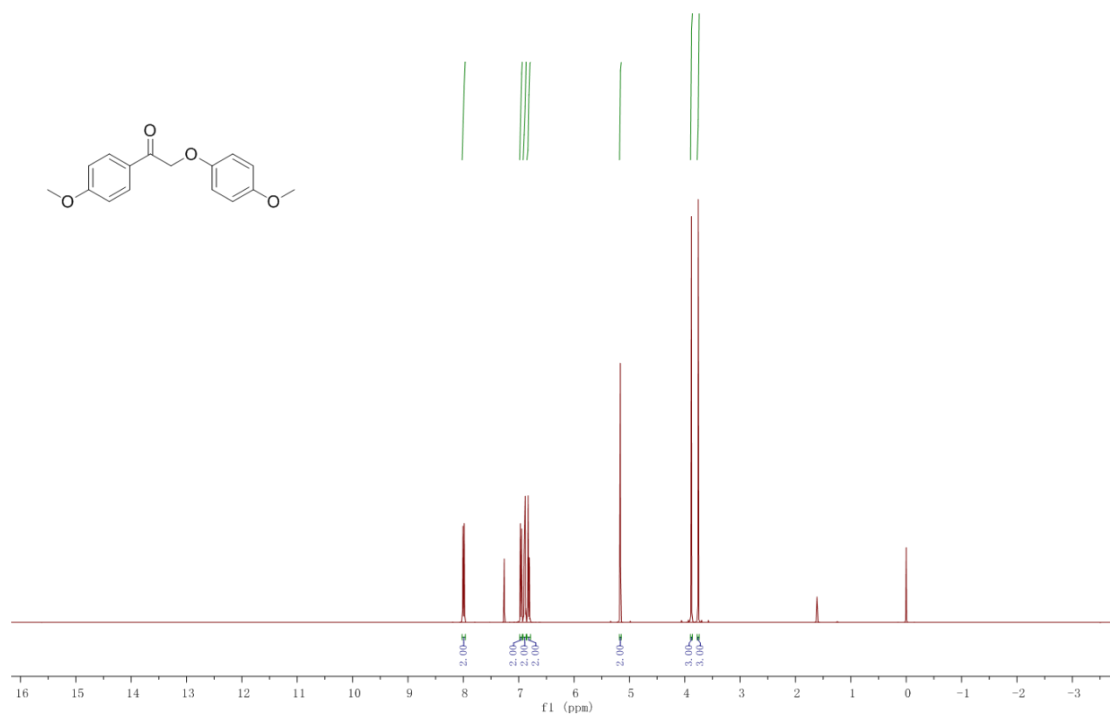

# <sup>13</sup>C NMR

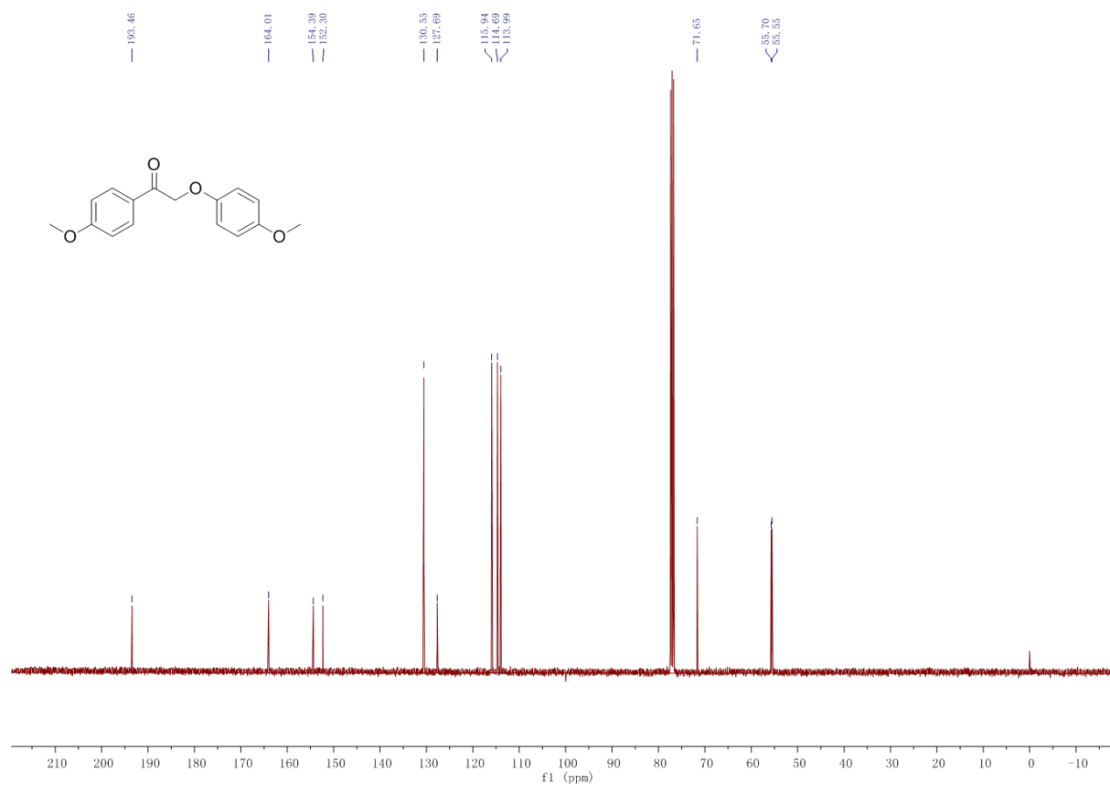

# <sup>1</sup>H NMR

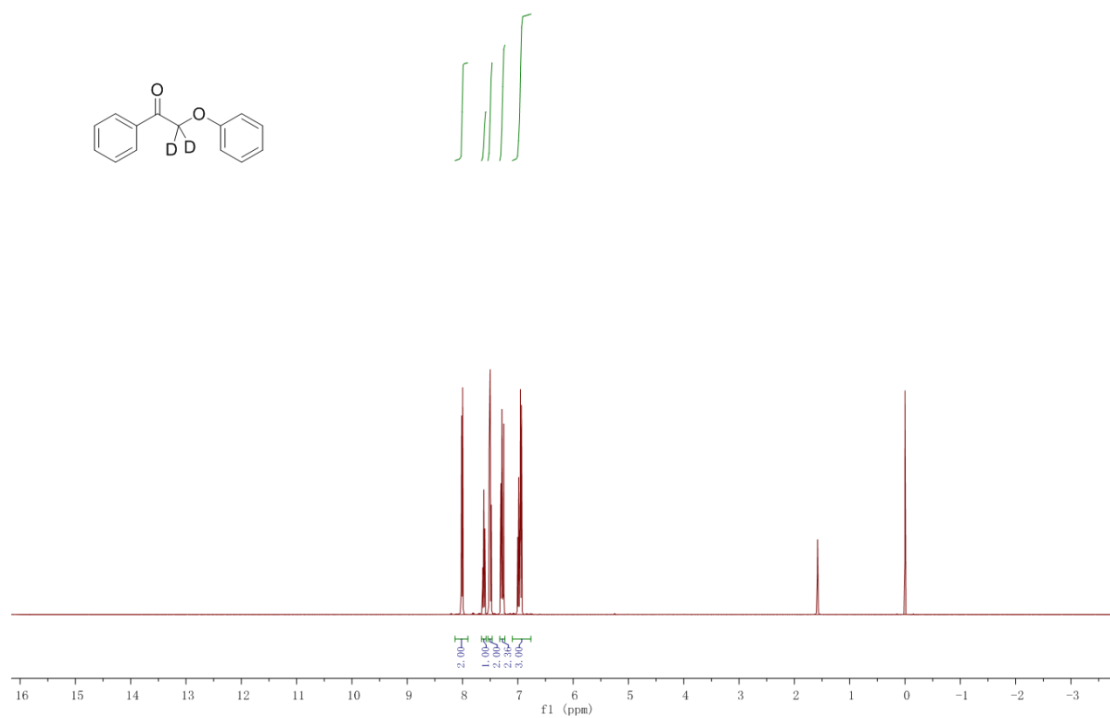

# <sup>13</sup>C NMR

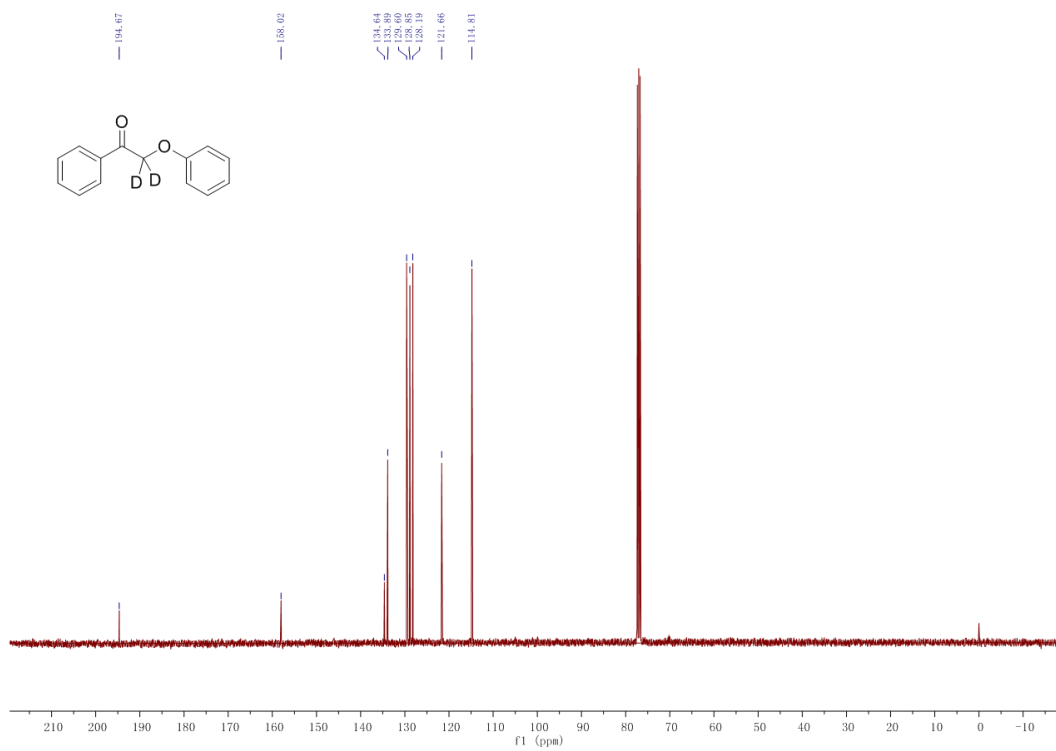

# <sup>1</sup>H NMR

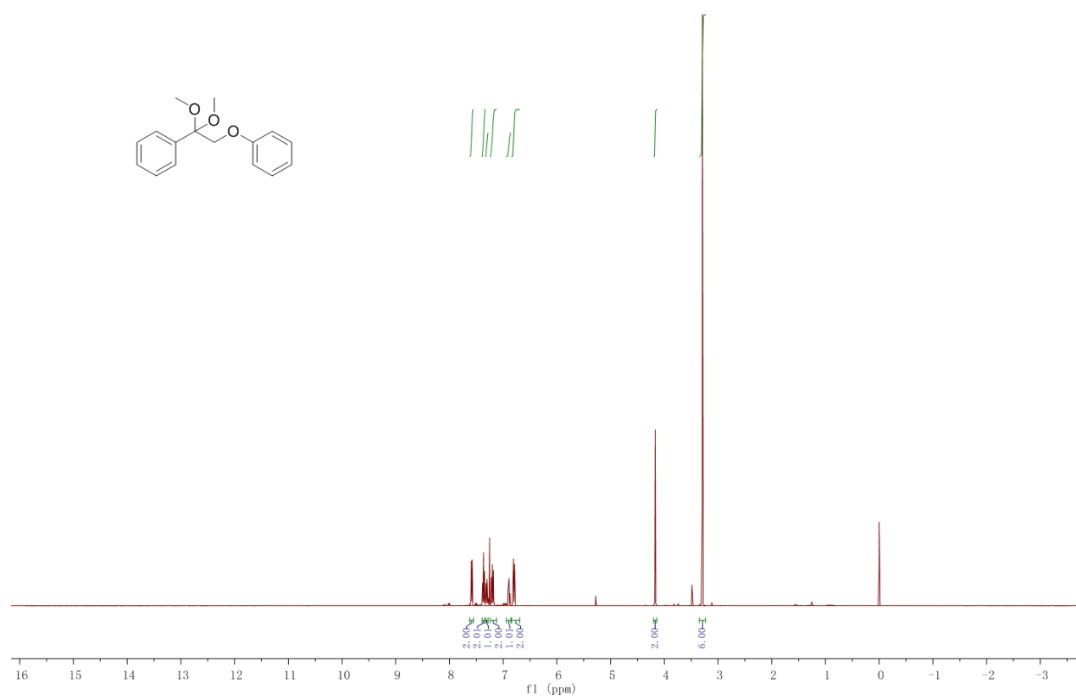

# <sup>13</sup>C NMR

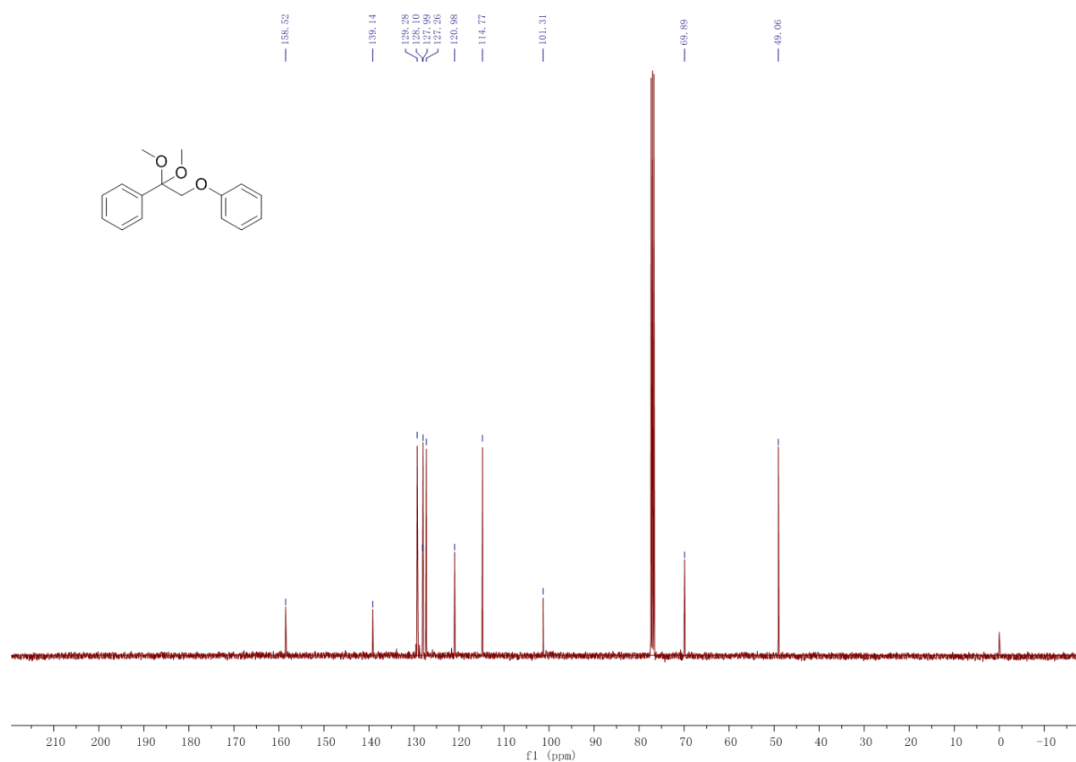

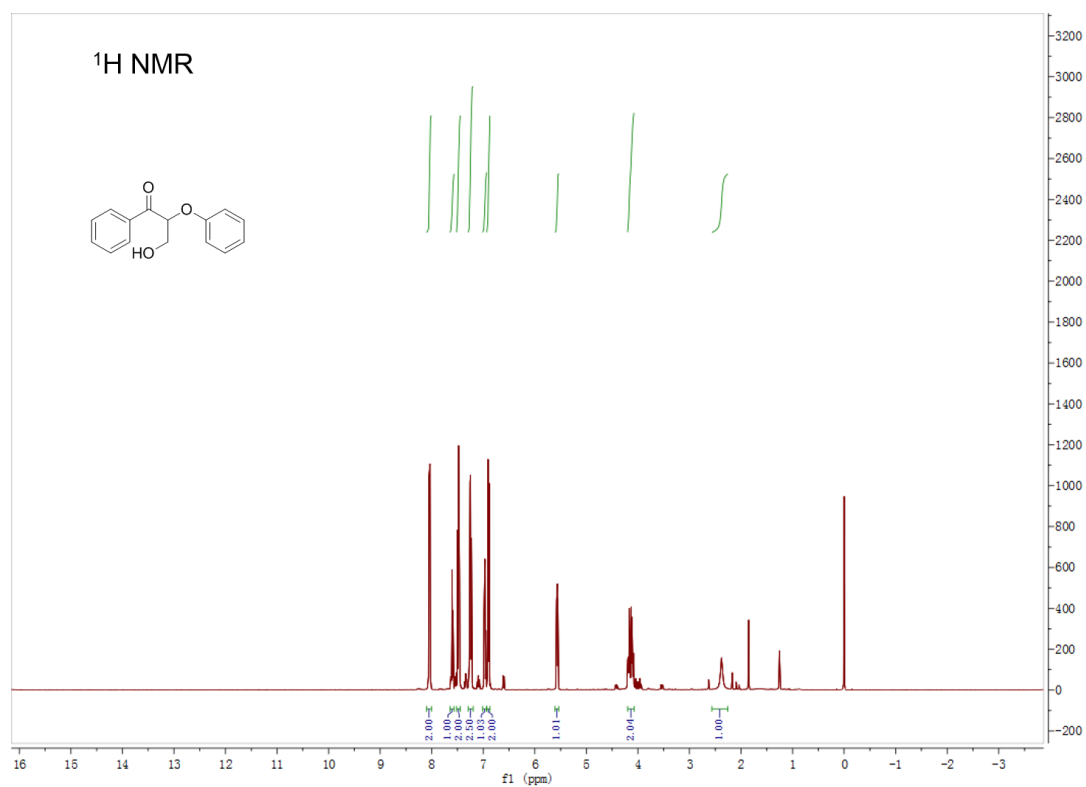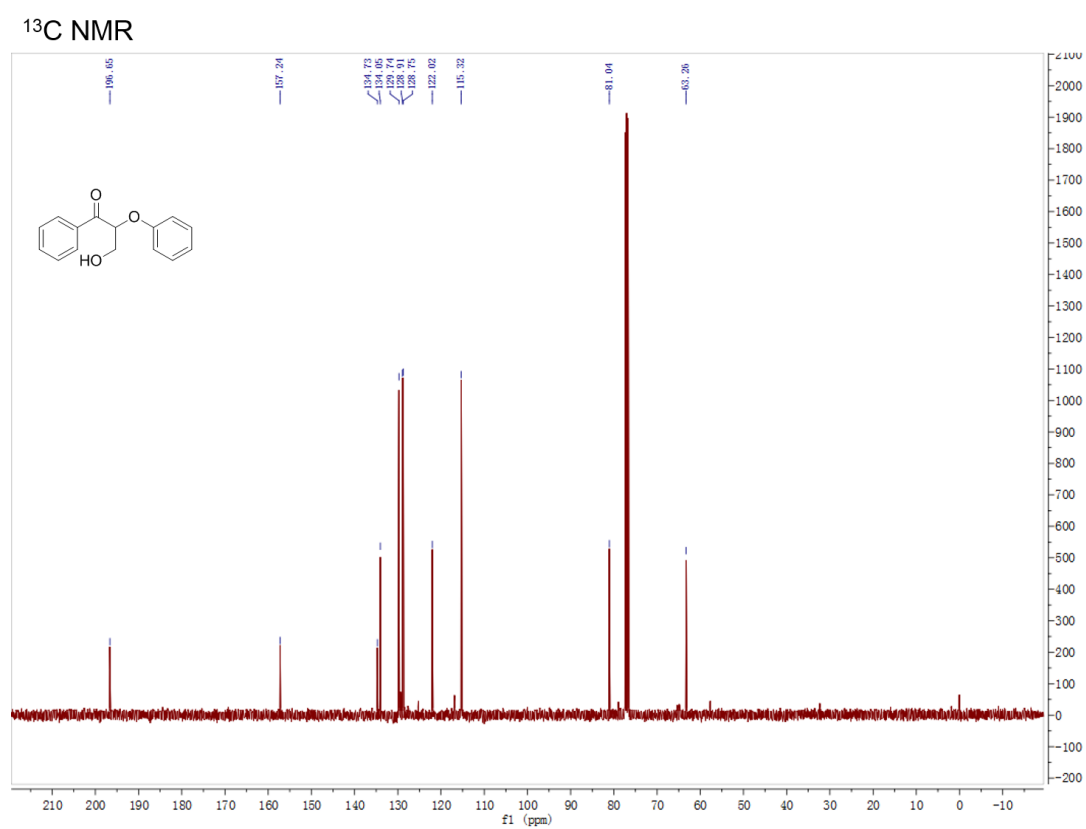

Supplement: c8gc00268a1.pdf [file c8gc00268a1.pdf]
